# Supplementary material for: Base-promoted domino radical cyclization of 1,6-enynes
Source: Royal Society of Chemistry journal article supplement (doi:10.1039/c9ob01550g), 2019-01-01

# Base-Promoted Domino Radical Cyclization of 1,6-Enynes

Le-Han Gao,<sup>a</sup> Jun-Yao Zhang,<sup>a</sup> Si-Zhe Song,<sup>a</sup> Ting-Ting Cao,<sup>a</sup> Guo-Ping Ge,<sup>a</sup> Qiang Li,<sup>b</sup> and Wen-Ting Wei<sup>\*a</sup>

<sup>a</sup> School of Materials Science and Chemical Engineering, Ningbo University, Ningbo 315211, China.

<sup>b</sup> Institution of Functional Organic Molecules and Materials, School of Chemistry and Chemical Engineering, Liaocheng University, Liaocheng, 252059, China.

Email: [weiwenting@nbu.edu.cn](mailto:weiwenting@nbu.edu.cn).

## Supporting Information

### List of Contents

|                                                                       |               |
|-----------------------------------------------------------------------|---------------|
| <b>(A) Typical experimental procedure for the radical cyclization</b> | <b>S2</b>     |
| <b>(B) Analytical data</b>                                            | <b>S3-12</b>  |
| <b>(C) Reference</b>                                                  | <b>S12</b>    |
| <b>(D) Spectra</b>                                                    | <b>S13-32</b> |

**(A) Typical experimental procedure for the radical cyclization:**

To a Schlenk tube were added 1,6-enynes **1** (0.2 mmol), ethers **2** (0.5 mL), TBPB (4.0 equiv) and Cs<sub>2</sub>CO<sub>3</sub> (1.2 equiv). Then the tube was stirred at 85 °C sealed in air for the indicated time until complete consumption of starting material as monitored by TLC analysis. After the reaction was finished, the solution was concentrated under reduced pressure, and the mixture was purified by flash column chromatography over silica gel (hexane/ethyl acetate) to afford the desired products **3**. All solvents were purchased from commercial sources and used without further purification.

Synthesis of **1a**: Step 1: The mixture of aniline (697.9 mg, 7.5 mmol) and K<sub>2</sub>CO<sub>3</sub> (1382.1 mg, 10 mmol) was dissolved in the THF (10 mL) under the ice-bath followed by dropwise addition of 3-bromoprop-1-yne (589.5 mg, 5 mmol), Then, warming to room temperature and the reaction was stirred overnight. After the starting material was completely reacted as monitored by TLC analysis, the solution was concentrated under reduced pressure, and the mixture was purified by flash column chromatography over silica gel (hexane/ethyl acetate = 15:1) to afford the *N*-(prop-2-yn-1-yl)aniline (4.5 mmol, 90% yield). Step 2: The *N*-(prop-2-yn-1-yl)aniline (589.9 mg, 4.5 mmol) and Et<sub>3</sub>N (910.7 mg, 9 mmol) was dissolved in the anhydrous CH<sub>2</sub>Cl<sub>2</sub> (10 mL), cooled to 0 °C and slowly add methacryloyl chloride (561.6 mg, 5.4 mmol), which react for 3 hours. After the reaction was finished, the solution was concentrated under reduced pressure, and the mixture was purified by flash column chromatography over silica gel (hexane/ethyl acetate = 10:1) to afford the **1a** (4.0 mmol, 89% yield).

**(B) Analytical data**

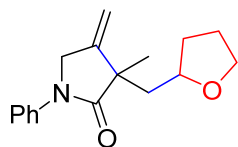

**3-Methyl-4-methylene-1-phenyl-3-((tetrahydrofuran-2-yl)methyl)pyrrolidin-2-one (3aa)**, yellow oil (0.0423 g, 78% yield,

d.r. = 5.7: 1);  $^1\text{H}$  NMR (400 MHz, DMSO-*d*<sub>6</sub>)  $\delta$ : 7.74 (d,  $J$  = 8.4 Hz, 0.3H), 7.69 (d,  $J$  = 8.0 Hz, 1.7H), 7.42-7.36 (m, 2H), 7.17-7.12 (m, 1H), 5.29-5.02 (m, 2H), 4.51 (d,  $J$  = 14.4 Hz, 1H), 4.38 (d,  $J$  = 16.0 Hz, 1H), 3.90-3.84 (m, 1H), 3.60-3.54 (m, 1H), 3.45-3.40 (m, 1H), 2.01-1.95 (m, 1H), 1.89-1.82 (m, 1H), 1.78-1.63 (m, 3H), 1.44-1.37 (m, 1H), 1.26 (s, 0.5H), 1.22 (s, 2.6H);  $^{13}\text{C}$  NMR (100 MHz, DMSO-*d*<sub>6</sub>)  $\delta$ : 177.0, 176.6, 146.3, 139.9, 139.4, 129.3, 129.1, 124.7, 124.4, 120.3, 120.1, 108.4, 108.1, 76.0, 75.7, 66.9 (2), 52.0, 51.9, 48.4, 48.1, 45.1, 44.9, 32.0, 31.8, 26.5, 25.7, 25.4; IR (KBr,  $\text{cm}^{-1}$ ): 1693 (C=O); HRMS  $m/z$  (ESI) calcd for C<sub>17</sub>H<sub>22</sub>NO<sub>2</sub> ([M+H]<sup>+</sup>) 272.1645, found 272.1649.

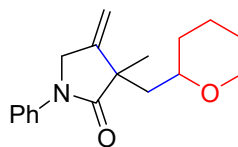

**3-Methyl-4-methylene-1-phenyl-3-((tetrahydro-2H-pyran-2-yl)methyl)pyrrolidin-2-one (3ab)**, yellow oil (0.0371 g, 65%

yield, d.r. > 20: 1);  $^1\text{H}$  NMR (400 MHz, CDCl<sub>3</sub>)  $\delta$ : 7.64 (d,  $J$  = 6.4 Hz, 2H), 7.35 (t,  $J$  = 6.4 Hz, 2H), 7.13 (t,  $J$  = 6.0 Hz, 1H), 5.28 (s, 1H), 5.08 (s, 1H), 4.45-4.41 (m, 1H), 4.37-4.34 (m, 1H), 3.73-3.70 (m, 1H), 3.35 (t,  $J$  = 8.4 Hz, 1H), 3.19-3.14 (m, 1H), 2.23-2.18 (m, 1H), 1.78-1.71 (m, 2H), 1.54-1.43 (m, 4H), 1.40-1.38 (m, 1H), 1.33 (s, 3H);  $^{13}\text{C}$  NMR (100 MHz, DMSO-*d*<sub>6</sub>)  $\delta$ : 177.2, 146.6, 139.9, 129.0, 124.4, 120.5, 108.4, 75.1, 68.1, 52.3, 47.5, 46.3, 32.1, 26.4, 25.8, 23.4; IR (KBr,  $\text{cm}^{-1}$ ): 1691 (C=O); HRMS  $m/z$  (ESI) calcd for C<sub>18</sub>H<sub>24</sub>NO<sub>2</sub> ([M+H]<sup>+</sup>) 286.1802, found 286.1800.

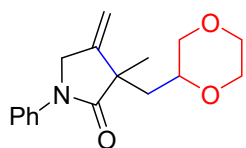

**3-((1,4-Dioxan-2-yl)methyl)-3-methyl-4-methylene-1-phenyl**

**pyrrolidin-2-one (3ac)**, yellow oil (0.0350 g, 61% yield, d.r. >

20: 1);  $^1\text{H}$  NMR (400 MHz, DMSO-*d*<sub>6</sub>)  $\delta$ : 7.65 (d,  $J$  = 7.6 Hz, 2H), 7.37 (t,  $J$  = 7.0 Hz, 2H), 7.14 (t,  $J$  = 6.8 Hz, 1H), 5.31 (s, 1H), 5.19 (s, 1H), 4.51 (d,  $J$  = 14.4 Hz, 1H), 4.38 (d,  $J$  = 14.0 Hz, 1H), 3.57-3.50 (m, 3H), 3.46-3.41 (m, 1H), 3.39-3.36 (m, 2H), 3.12 (t,  $J$  = 10.2 Hz, 1H), 1.87 (t,  $J$  = 12.0 Hz, 1H), 1.53 (d,  $J$  = 13.6 Hz, 1H), 1.22 (s, 3H);  $^{13}\text{C}$  NMR (100 MHz, DMSO-*d*<sub>6</sub>)  $\delta$ : 176.7, 146.2, 139.8, 129.1, 124.6, 120.6, 108.7, 73.1, 70.7, 66.5, 66.1, 52.2, 47.2, 26.3; IR (KBr,  $\text{cm}^{-1}$ ): 1698 (C=O); HRMS  $m/z$  (ESI) calcd for C<sub>17</sub>H<sub>22</sub>NO<sub>3</sub> ([M+H]<sup>+</sup>) 288.1594, found 288.1599.

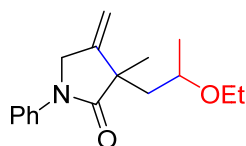

**3-(2-Ethoxypropyl)-3-methyl-4-methylene-1-phenylpyrrolidin-2-one (3ad)**, colorless oil (0.0361 g, 66% yield, d.r. > 20: 1);

$^1\text{H}$  NMR (500 MHz, CDCl<sub>3</sub>)  $\delta$ : 7.77 (d,  $J$  = 10.0 Hz, 2H), 7.36 (t,  $J$  = 10.0 Hz, 2H), 7.11 (t,  $J$  = 9.0 Hz, 1H), 5.28 (t,  $J$  = 2.5 Hz, 1H), 5.07 (t,  $J$  = 3.0 Hz, 1H), 4.52-4.47 (m, 1H), 4.39-4.35 (m, 1H), 3.58-3.53 (m, 1H), 3.48-3.42 (m, 1H), 3.08-3.01 (m, 1H), 2.30-2.24 (m, 1H), 1.61-1.57 (m, 1H), 1.32 (s, 3H), 1.11 (d,  $J$  = 7.5 Hz, 3H), 0.81 (t,  $J$  = 8.5 Hz, 3H);  $^{13}\text{C}$  NMR (125 MHz, CDCl<sub>3</sub>)  $\delta$ : 177.7, 145.9, 139.6, 128.8, 123.9, 119.2, 107.6, 71.9, 63.3, 51.7, 48.1, 46.2, 27.0, 19.5, 15.2; IR (KBr,  $\text{cm}^{-1}$ ): 1683 (C=O); HRMS  $m/z$  (ESI) calcd for C<sub>17</sub>H<sub>24</sub>NO<sub>2</sub> ([M+H]<sup>+</sup>) 274.1802, found 274.1800.

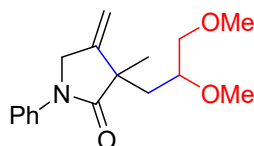

**3-(2,3-Dimethoxypropyl)-3-methyl-4-methylene-1-phenylpyrrolidin-2-one (3ae)**, colorless oil (0.0399 g, 69% yield, d.r. =

1: 1);  $^1\text{H}$  NMR (400 MHz, DMSO-*d*<sub>6</sub>)  $\delta$ : 7.74-7.62 (m, 2H), 7.40-7.36 (m, 2H), 7.16-7.11 (m, 1H), 5.32-5.16 (m, 2H), 4.58-4.37 (m, 2H), 3.30 (d,  $J$  = 3.6 Hz, 3H),

3.25 (t,  $J = 20.4$  Hz, 3H), 3.09 (s, 1.5H), 3.03 (s, 1.5H), 2.06-1.96 (m, 1H), 1.79-1.65 (m, 1H), 1.25 (s, 1.5H), 1.22 (s, 1.5H);  $^{13}\text{C}$  NMR (100 MHz, DMSO- $d_6$ )  $\delta$ : 177.0, 176.7, 146.1, 145.9, 139.8, 139.6, 129.3, 129.1, 124.5, 124.3, 120.2, 120.1, 108.5, 108.3, 77.0 (2), 74.4(2), 58.9, 58.4, 51.8 (2), 38.6 (2), 26.7, 26.1, 25.7; IR (KBr,  $\text{cm}^{-1}$ ): 1679 (C=O); HRMS  $m/z$  (ESI) calcd for  $\text{C}_{17}\text{H}_{24}\text{NO}_3$  ( $[\text{M}+\text{H}]^+$ ) 290.1751, found 290.1755.

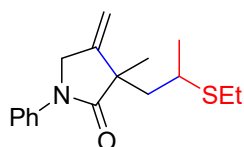

**3-(2-(Ethylthio)propyl)-3-methyl-4-methylene-1-phenylpyrrolidin-2-one (3af)**, yellow oil (0.0411 g, 71% yield, d.r. = 4: 1);

$^1\text{H}$  NMR (500 MHz,  $\text{CDCl}_3$ )  $\delta$ : 7.72-7.69 (m, 1.6H), 7.67-7.62 (m, 0.4H), 7.41-7.36 (m, 2H), 7.19-7.13 (m, 1H), 5.30-5.25 (m, 1H), 5.20-5.14 (m, 0.8H), 5.09 (t,  $J = 3.0$  Hz, 0.2H), 4.56-4.42 (m, 2H), 3.06-2.98 (m, 0.8H), 2.87-2.80 (m, 1H), 2.58-2.43 (m, 2H), 2.33-2.27 (m, 0.2H), 1.78-1.62 (m, 1H), 1.39 (s, 2.5H), 1.33 (s, 0.6H), 1.29-1.20 (m, 3H), 1.17 (t,  $J = 9.0$  Hz, 2.4H), 1.08 (t,  $J = 9.0$  Hz, 0.6H);  $^{13}\text{C}$  NMR (125 MHz,  $\text{CDCl}_3$ )  $\delta$ : 176.9, 176.0, 145.7, 145.1, 139.4, 139.0, 128.9, 128.8, 124.8, 124.4, 120.1, 120.0, 108.8, 108.2, 52.6, 52.1, 52.0, 41.5, 36.5, 36.2, 24.3, 24.1, 23.0, 22.7, 15.0, 14.4; IR (KBr,  $\text{cm}^{-1}$ ): 1691 (C=O); HRMS  $m/z$  (ESI) calcd for  $\text{C}_{17}\text{H}_{24}\text{NOS}$  ( $[\text{M}+\text{H}]^+$ ) 290.1573, found 290.1569.

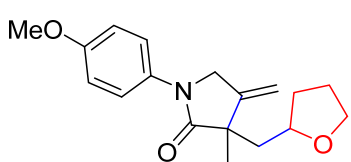

**1-(4-Methoxyphenyl)-3-methyl-4-methylene-3-((tetrahydrofuran-2-yl)methyl)pyrrolidin-2-one (3ba)**,

yellow oil (0.0506 g, 84% yield, d.r. = 14: 1);  $^1\text{H}$  NMR (500 MHz,  $\text{CDCl}_3$ )  $\delta$ : 7.60 (d,  $J = 9.0$  Hz, 0.2H), 7.53 (d,  $J = 9.0$  Hz, 1.9H), 6.91 (t,  $J = 8.5$  Hz, 2H), 5.26 (t,  $J = 2.0$  Hz, 1H), 5.09 (t,  $J = 2.5$  Hz, 1H), 4.43-4.37 (m, 2H),

4.05-3.99 (m, 1H), 3.80 (s, 3H), 3.74 (t,  $J = 11.0$  Hz, 1H), 3.58-3.54 (m, 1H), 2.19-2.14 (m, 1H), 1.95-1.85 (m, 2H), 1.79-1.74 (m, 1H), 1.63-1.59 (m, 1H), 1.50 (t,  $J = 8.5$  Hz, 1H), 1.36 (s, 0.2H), 1.32 (s, 2.8H);  $^{13}\text{C}$  NMR (125 MHz,  $\text{CDCl}_3$ )  $\delta$ : 177.1, 156.6, 146.5, 132.7, 122.4, 121.7, 114.1, 114.0, 107.8, 107.7, 75.8, 67.3, 55.5, 52.8, 48.0, 45.0, 31.9, 26.3, 25.3; IR (KBr,  $\text{cm}^{-1}$ ): 1676 (C=O); HRMS  $m/z$  (ESI) calcd for  $\text{C}_{18}\text{H}_{24}\text{NO}_3$  ( $[\text{M}+\text{H}]^+$ ) 302.1751, found 302.1753.

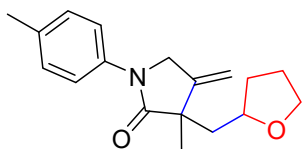

**3-Methyl-4-methylene-3-((tetrahydrofuran-2-yl)methyl)**

**-1-(p-tolyl)pyrrolidin-2-one (3ca)**, yellow oil (0.0462 g,

81% yield, d.r. = 2.3: 1);  $^1\text{H}$  NMR (500 MHz,  $\text{CDCl}_3$ )  $\delta$ : 7.59 (d,  $J = 5.0$  Hz, 0.6H), 7.53 (d,  $J = 5.0$  Hz, 1.4H), 7.18 (t,  $J = 9.5$  Hz, 2H), 5.26-5.21 (m, 1H), 5.15-5.08 (m, 1H), 4.53-4.36 (m, 2H), 4.04-3.99 (m, 0.7H), 3.80-3.71 (m, 1.3H), 3.60-3.54 (m, 1H), 2.34 (s, 0.9H), 2.33 (s, 2.1H), 2.19-2.14 (m, 1H), 2.05-2.00 (m, 0.7H), 1.94-1.84 (m, 2.3H), 1.78-1.74 (m, 1H), 1.51-1.46 (m, 1H), 1.33 (s, 0.9H), 1.33 (s, 2.1H);  $^{13}\text{C}$  NMR (125 MHz,  $\text{CDCl}_3$ )  $\delta$ : 177.2, 176.6, 146.4, 146.2, 137.0, 136.6, 134.4, 134.0, 129.5, 129.3, 120.5, 119.9, 107.8, 107.7, 76.4, 75.7, 67.3, 52.4, 52.3, 48.6, 48.2, 45.5, 44.9, 31.9 (2), 26.3, 25.9, 25.6, 25.3, 20.9; IR (KBr,  $\text{cm}^{-1}$ ): 1677 (C=O); HRMS  $m/z$  (ESI) calcd for  $\text{C}_{18}\text{H}_{24}\text{NO}_2$  ( $[\text{M}+\text{H}]^+$ ) 286.1802, found 286.1798.

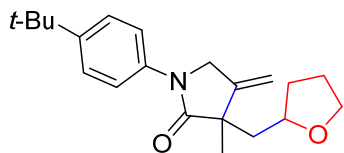

**1-(4-(tert-Butyl)phenyl)-3-methyl-4-methylene-3-((tetrahydrofuran-2-yl)methyl)pyrrolidin-2-one (3da)**,

yellow oil (0.0537 g, 82% yield, d.r. = 1: 1);  $^1\text{H}$  NMR

(500 MHz,  $\text{CDCl}_3$ )  $\delta$ : 7.65-7.62 (m, 0.5H), 7.58-7.57 (m, 1H), 7.42-7.35 (m, 2H), 7.14-7.12 (m, 0.5H), 5.27 (t,  $J = 2.0$  Hz, 0.5H), 5.22-5.15 (m, 0.5H), 5.10-5.08 (m,

1H), 4.55-4.50 (m, 1H), 4.44-4.38 (m, 1.5H), 4.04-4.01 (m, 0.5H), 3.80-3.75 (m, 1H), 3.72-3.55 (m, 1H), 2.23-2.14 (m, 1H), 2.04-2.01 (m, 0.5H), 1.94-1.86 (m, 2H), 1.78-1.73 (m, 1.5H), 1.51-1.44 (m, 1H), 1.32 (s, 6H), 1.31 (s, 6H); <sup>13</sup>C NMR (125 MHz, CDCl<sub>3</sub>) δ: 177.3, 176.7, 146.4, 146.1, 140.1, 139.8, 136.9, 136.5, 125.8, 125.7, 120.1, 119.6, 107.8 (2), 76.4, 75.7, 67.3 (2), 52.3, 52.2, 48.6, 48.2, 45.4, 44.8, 31.9 (2), 31.4 (2), 31.3, 26.8, 26.0, 25.6, 25.3; IR (KBr, cm<sup>-1</sup>): 1685 (C=O); HRMS *m/z* (ESI) calcd for C<sub>21</sub>H<sub>30</sub>NO<sub>2</sub> ([M+H]<sup>+</sup>) 328.2271, found 328.2275.

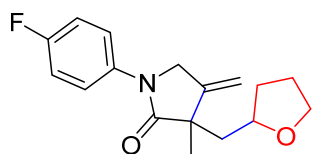

**1-(4-Fluorophenyl)-3-methyl-4-methylene-3-((tetrahydrofuran-2-yl)methyl)pyrrolidin-2-one (3ea)**, yellow oil

(0.0434 g, 75% yield, d.r. = 2.3: 1); <sup>1</sup>H NMR (500 MHz, CDCl<sub>3</sub>) δ: 7.69-7.66 (m, 0.6H), 7.62-7.59 (m, 1.4H), 7.09-7.04 (m, 2H), 5.29-5.22 (m, 1H), 5.16-5.11 (m, 1H), 4.55-4.35 (m, 2H), 4.03-3.99 (m, 0.7H), 3.88-3.84 (m, 0.3H), 3.80-3.70 (m, 1H), 3.62-3.52 (m, 1H), 2.19-2.14 (m, 1H), 1.94-1.85 (m, 3H), 1.63-1.60 (m, 1H), 1.52-1.46 (m, 1H), 1.36 (s, 0.9H), 1.33 (s, 2.1H); <sup>13</sup>C NMR (125 MHz, CDCl<sub>3</sub>) δ: 177.5, 176.8, 160.0 (d, *J*<sub>C-F</sub> = 242.3 Hz), 159.9 (d, *J*<sub>C-F</sub> = 242.9 Hz), 146.0, 145.9, 135.6 (2), 122.3 (d, *J*<sub>C-F</sub> = 7.9 Hz), 121.7 (d, *J*<sub>C-F</sub> = 7.9 Hz), 115.6 (d, *J*<sub>C-F</sub> = 19.4 Hz), 115.4 (d, *J*<sub>C-F</sub> = 19.4 Hz), 108.0, 107.9, 76.3, 75.7, 67.4, 67.3, 52.6, 52.4, 48.5, 48.1, 45.5, 45.1, 32.0, 31.8, 26.4, 25.8, 25.5, 25.3; <sup>19</sup>F NMR (471 MHz, DMSO-*d*<sub>6</sub>) δ: -117.5, -118.0; IR (KBr, cm<sup>-1</sup>): 1690 (C=O); HRMS *m/z* (ESI) calcd for C<sub>17</sub>H<sub>21</sub>FN<sub>2</sub>O<sub>2</sub> ([M+H]<sup>+</sup>) 290.1551, found 290.1553.

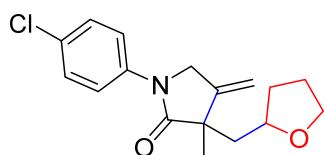

**1-(4-Chlorophenyl)-3-methyl-4-methylene-3-((tetrahydrofuran-2-yl)methyl)pyrrolidin-2-one (3fa)**, yellow

oil (0.0445 g, 73% yield, d.r. = 9: 1);  $^1\text{H}$  NMR (500 MHz,  $\text{CDCl}_3$ )  $\delta$ : 7.70-7.67 (m, 1H), 7.62 (d,  $J = 9.0$  Hz, 1H), 7.36-7.32 (m, 2H), 5.29-5.23 (m, 1H), 5.16-5.09 (m, 1H), 4.54-4.35 (m, 2H), 4.13-4.01 (m, 1H), 3.79-3.69 (m, 1H), 3.61-3.51 (m, 1H), 2.00-1.84 (m, 3H), 1.76-1.58 (m, 2H), 1.51-1.42 (m, 1H), 1.33 (s, 2.7H), 1.29 (s, 0.3H);  $^{13}\text{C}$  NMR (125 MHz,  $\text{CDCl}_3$ )  $\delta$ : 177.7, 177.0, 145.7, 145.1, 138.1, 137.5, 129.0, 128.9, 128.8, 121.4, 120.8, 108.2, 108.0, 76.3, 75.7, 67.4 (2), 52.2, 52.1, 48.6, 48.2, 45.5, 45.1, 32.0, 31.8, 26.4, 25.8, 25.5, 25.3; IR (KBr,  $\text{cm}^{-1}$ ): 1699 (C=O); HRMS  $m/z$  (ESI) calcd for  $\text{C}_{17}\text{H}_{21}\text{ClNO}_2$  ( $[\text{M}+\text{H}]^+$ ) 306.1255, found 306.1251.

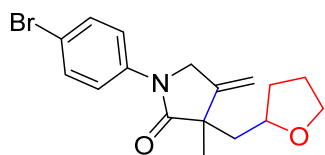

**1-(4-Bromophenyl)-3-methyl-4-methylene-3-((tetrahydrofuran-2-yl)methyl)pyrrolidin-2-one (3ga)**, yellow

oil (0.0517 g, 74% yield, d.r. = 5: 1);  $^1\text{H}$  NMR (500 MHz,  $\text{CDCl}_3$ )  $\delta$ : 7.64-7.62 (m, 1H), 7.58 (d,  $J = 9.0$  Hz, 1H), 7.50-7.46 (m, 2H), 5.33-5.23 (m, 1H), 5.16-5.08 (m, 1H), 4.54-4.37 (m, 2H), 4.13-3.98 (m, 1H), 3.86-3.69 (m, 1H), 3.60-3.51 (m, 1H), 2.01-1.85 (m, 3H), 1.75-1.60 (m, 2H), 1.51-1.42 (m, 1H), 1.32 (s, 2.5H), 1.29 (s, 0.5H);  $^{13}\text{C}$  NMR (125 MHz,  $\text{CDCl}_3$ )  $\delta$ : 177.7, 177.2, 145.6, 145.1, 138.6, 138.0, 131.9, 131.7, 121.7, 121.1, 117.4, 117.1, 108.3, 108.2, 76.3, 75.6, 67.4, 67.0, 52.1, 52.0, 48.7, 48.3, 45.6, 45.1, 32.0, 31.8, 26.4, 25.8, 25.5, 25.3; IR (KBr,  $\text{cm}^{-1}$ ): 1696 (C=O); HRMS  $m/z$  (ESI) calcd for  $\text{C}_{17}\text{H}_{21}\text{BrNO}_2$  ( $[\text{M}+\text{H}]^+$ ) 350.0750, found 350.0752.

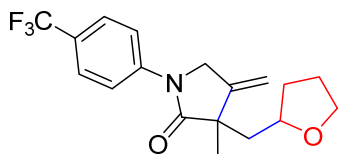

**3-Methyl-4-methylene-3-((tetrahydrofuran-2-yl)methyl)-1-(4-(trifluoromethyl)phenyl)pyrrolidin-2-one (3ha)**, yellow oil (0.0482 g, 71% yield, d.r. = 4: 1);  $^1\text{H}$

NMR (500 MHz,  $\text{CDCl}_3$ )  $\delta$ : 7.88 (d,  $J = 8.5$  Hz, 0.4H), 7.82 (d,  $J = 8.5$  Hz, 1.6H),



7.63 (t,  $J = 20.5$  Hz, 2H), 5.33-5.26 (m, 1H), 5.18-5.13 (m, 1H), 4.60-4.40 (m, 2H), 4.05-4.00 (m, 0.8H), 3.82-3.67 (m, 1.2H), 3.60-3.49 (m, 1H), 2.17-1.85 (m, 3H), 1.76-1.62 (m, 2H), 1.52-1.44 (m, 1H), 1.38 (s, 0.6H), 1.34 (s, 2.4H);  $^{13}\text{C}$  NMR (125 MHz,  $\text{CDCl}_3$ )  $\delta$ : 178.2, 177.6, 145.4, 145.3, 142.5, 141.9, 126.1 ( $q$ ,  $J_{\text{C-F}} = 2.7$  Hz), 126.0 ( $q$ ,  $J_{\text{C-F}} = 2.8$  Hz), 125.8 ( $q$ ,  $J_{\text{C-F}} = 30.0$  Hz), 119.5, 119.2, 119.1, 108.4, 108.2, 76.2, 75.6, 67.4, 52.0, 48.8, 48.4, 45.6, 45.2, 32.0, 31.7, 26.5, 25.8, 25.5, 25.3;  $^{19}\text{F}$  NMR (471 MHz,  $\text{DMSO-}d_6$ )  $\delta$ : -62.1 (2); IR (KBr,  $\text{cm}^{-1}$ ): 1687 (C=O); HRMS  $m/z$  (ESI) calcd for  $\text{C}_{18}\text{H}_{21}\text{F}_3\text{NO}_2$  ( $[\text{M}+\text{H}]^+$ ) 340.1519, found 340.1515.

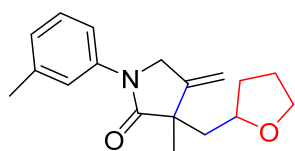

**3-Methyl-4-methylene-3-((tetrahydrofuran-2-yl)methyl)**

**-1-(m-tolyl)pyrrolidin-2-one (3ia)**, yellow oil (0.0456 g,

80% yield, d.r. = 4: 1);  $^1\text{H}$  NMR (500 MHz,  $\text{CDCl}_3$ )  $\delta$ : 7.59 (s, 0.2H), 7.53 (s, 0.8H), 7.47 (d,  $J = 8.5$  Hz, 0.2H), 7.41 (d,  $J = 8.0$  Hz, 0.8H), 7.28-7.23 (m, 1H), 6.99-6.95 (m, 1H), 5.27-5.22 (m, 1H), 5.15-5.09 (m, 1H), 4.53-4.40 (m, 2H), 4.04-3.99 (m, 0.8H), 3.80-3.72 (m, 1.2H), 3.61-3.52 (m, 1H), 2.38 (s, 0.6H), 2.36 (s, 2.4H), 2.19-2.14 (m, 1H), 1.95-1.85 (m, 2H), 1.79-1.74 (m, 1H), 1.64-1.61 (m, 1H), 1.51-1.46 (m, 1H), 1.36 (s, 0.6H), 1.33 (s, 2.4H);  $^{13}\text{C}$  NMR (125 MHz,  $\text{CDCl}_3$ )  $\delta$ : 177.4, 176.9, 146.3, 146.1, 139.4, 139.0, 138.8, 138.6, 128.8, 128.6, 125.5, 125.3, 121.2, 120.7, 117.4, 117.0, 107.8, 107.7, 76.4, 75.7, 67.4, 67.3, 52.4, 52.3, 48.7, 48.3, 45.4, 44.9, 31.9 (2), 26.4, 25.9, 25.6, 25.3, 21.7 (2); IR (KBr,  $\text{cm}^{-1}$ ): 1688 (C=O); HRMS  $m/z$  (ESI) calcd for  $\text{C}_{18}\text{H}_{24}\text{NO}_2$  ( $[\text{M}+\text{H}]^+$ ) 286.1802, found 286.1800.

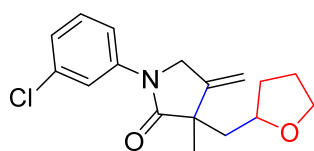

**1-(3-Chlorophenyl)-3-methyl-4-methylene-3-((tetrahydrofuran-2-yl)methyl)pyrrolidin-2-one (3ja)**, yellow oil

(0.0433 g, 71% yield, d.r. = 4: 1);  $^1\text{H}$  NMR (500 MHz,  $\text{CDCl}_3$ )  $\delta$ : 7.80 (s, 0.2H), 7.73 (s, 0.8H), 7.64 (d,  $J = 5.0$  Hz, 0.2H), 7.58 (d,  $J = 10.0$  Hz, 0.8H), 7.32-7.28 (m, 1H), 7.15-7.05 (m, 1H), 5.31-5.23 (m, 1H), 5.16-5.11 (m, 1H), 4.56-4.35 (m, 2H), 4.04-3.99 (m, 1H), 3.80-3.70 (m, 1H), 3.61-3.52 (m, 1H), 2.18-2.14 (m, 1H), 2.06-1.98 (m, 1H), 1.94-1.79 (m, 3H), 1.64-1.60 (m, 1H), 1.36 (s, 0.6H), 1.33 (s, 2.4H);  $^{13}\text{C}$  NMR (125 MHz,  $\text{CDCl}_3$ )  $\delta$ : 177.8 (2), 145.6, 140.2 (2), 134.5, 129.9, 129.8, 124.6, 124.3, 120.2, 119.8, 118.1, 117.6, 108.2, 108.0, 76.3, 75.6, 67.4 (2), 52.2, 52.1, 48.8, 48.3, 45.5, 45.1, 32.0, 31.8, 26.4, 25.8, 25.5, 25.3; IR (KBr,  $\text{cm}^{-1}$ ): 1681 (C=O); HRMS  $m/z$  (ESI) calcd for  $\text{C}_{17}\text{H}_{21}\text{ClNO}_2$  ( $[\text{M}+\text{H}]^+$ ) 306.1255, found 306.1251.

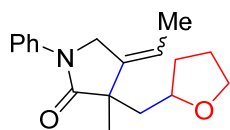

**4-Ethylidene-3-methyl-1-phenyl-3-((tetrahydrofuran-2-yl)methyl)pyrrolidin-2-one (3la)**, yellow oil (0.0359 g, 63% yield, d.r.

= 5.7: 1);  $^1\text{H}$  NMR (500 MHz,  $\text{CDCl}_3$ )  $\delta$ : 7.72-7.70 (m, 0.3H), 7.67-7.65 (m, 1.7H), 7.37 (t,  $J = 12.5$  Hz, 2H), 7.16-7.11 (m, 1H), 5.64-5.60 (m, 1H), 4.42-4.34 (m, 2H), 4.02-3.97 (m, 0.8H), 3.79-3.69 (m, 1.2H), 3.63-3.52 (m, 1H), 2.26-2.21 (m, 1H), 2.07-2.01 (m, 1H), 1.95-1.83 (m, 4H), 1.78 (d,  $J = 5.0$  Hz, 3H), 1.48 (s, 0.4H), 1.42 (s, 2.5H);  $^{13}\text{C}$  NMR (125 MHz,  $\text{CDCl}_3$ )  $\delta$ : 178.4, 139.7 (2), 135.3, 135.2, 128.9, 128.8, 124.6, 124.2, 120.3, 120.0, 119.8, 119.2, 76.1, 67.3, 67.2, 52.5, 52.4, 48.1, 48.0, 43.0, 42.8, 31.9, 31.5, 25.5, 25.4, 24.8 (2), 14.1, 13.7; IR (KBr,  $\text{cm}^{-1}$ ): 1694 (C=O); HRMS  $m/z$  (ESI) calcd for  $\text{C}_{18}\text{H}_{24}\text{NO}_2$  ( $[\text{M}+\text{H}]^+$ ) 286.1802, found 286.1800.

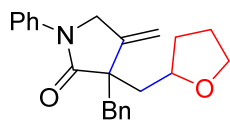

**3-Benzyl-4-methylene-1-phenyl-3-((tetrahydrofuran-2-yl)methyl)pyrrolidin-2-one (3na)**, yellow oil (0.0417 g, 60% yield,

d.r. > 20: 1);  $^1\text{H}$  NMR (500 MHz,  $\text{CDCl}_3$ )  $\delta$ : 7.41 (d,  $J = 8.0$  Hz, 2H), 7.34-7.29 (m, 2H), 7.18-7.09 (m, 6H), 5.33 (s, 1H), 5.24 (s, 1H), 4.14 (d,  $J = 13.5$  Hz, 1H), 3.88-3.84 (m, 1H), 3.80-3.76 (m, 1H), 3.63-3.59 (m, 1H), 3.50 (d,  $J = 13.5$  Hz, 1H), 3.25 (d,  $J = 13.0$  Hz, 1H), 2.74 (d,  $J = 12.5$  Hz, 1H), 2.26-2.20 (m, 1H), 2.14-2.10 (m, 1H), 2.03-1.99 (m, 1H), 1.90-1.75 (m, 3H);  $^{13}\text{C}$  NMR (125 MHz,  $\text{CDCl}_3$ )  $\delta$ : 175.2, 142.9, 138.6, 136.4, 130.3, 128.8, 127.8, 126.6, 124.9, 120.6, 109.2, 76.3, 67.2, 54.8, 52.6, 46.8, 43.7, 31.8, 25.9; IR (KBr,  $\text{cm}^{-1}$ ): 1698 (C=O); HRMS  $m/z$  (ESI) calcd for  $\text{C}_{23}\text{H}_{26}\text{NO}_2$  ( $[\text{M}+\text{H}]^+$ ) 348.1958, found 348.1960.

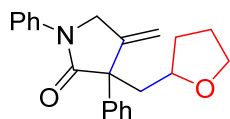

**4-Methylene-1,3-diphenyl-3-((tetrahydrofuran-2-yl)methyl)pyrrolidin-2-one (30a)**, yellow oil (0.0446 g, 67% yield, d.r. =

1.5: 1);  $^1\text{H}$  NMR (500 MHz,  $\text{CDCl}_3$ )  $\delta$ : 7.65 (d,  $J = 9.0$  Hz, 1.2H), 7.59 (d,  $J = 9.0$  Hz, 0.8H), 7.47 (d,  $J = 8.5$  Hz, 0.8H), 7.43 (d,  $J = 8.0$  Hz, 1.2H), 7.33-7.28 (m, 2H), 7.26-7.22 (m, 2H), 7.16-7.05 (m, 2H), 5.50-5.40 (m, 1H), 5.19-5.16 (m, 1H), 4.48-4.40 (m, 2H), 4.14-4.09 (m, 0.4H), 3.91-3.88 (m, 0.6H), 3.76-3.72 (m, 1H), 3.58-3.51 (m, 1H), 2.63-2.49 (m, 1H), 2.35-2.31 (m, 1H), 2.04-1.82 (m, 3H), 1.75-1.68 (m, 1H);  $^{13}\text{C}$  NMR (125 MHz,  $\text{CDCl}_3$ )  $\delta$ : 173.8, 173.4, 142.7, 142.5, 141.1, 141.0, 138.5, 138.0, 127.9, 127.8, 127.5, 127.4, 126.1, 126.0, 125.6, 125.4, 123.8, 123.4, 119.2, 118.9, 110.5, 110.3, 74.5, 66.4, 66.3, 56.3, 55.7, 51.4, 42.6, 42.1, 31.3, 31.0, 24.8, 24.4; IR (KBr,  $\text{cm}^{-1}$ ): 1676 (C=O); HRMS  $m/z$  (ESI) calcd for  $\text{C}_{22}\text{H}_{24}\text{NO}_2$  ( $[\text{M}+\text{H}]^+$ ) 334.1802, found 334.1804.

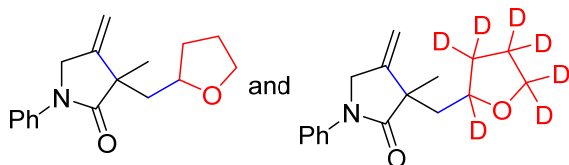

**3aa and 3aa-d7**, yellow oil (75% yield, d.r. = 5.7: 1);  $^1\text{H}$  NMR (500

MHz, CDCl<sub>3</sub>) δ: 7.72 (d, *J* = 8.5 Hz, 0.3H), 7.67 (d, *J* = 7.5 Hz, 1.7H), 7.40-7.35 (m, 2H), 7.17-7.12 (m, 1H), 5.28-5.22 (m, 1H), 5.16-5.10 (m, 1H), 4.54-4.39 (m, 2H), 4.05-3.99 (m, 0.6H), 3.77-3.72 (m, 0.6H), 3.59-3.53 (m, 0.6H), 2.20-2.15 (m, 1H), 2.03-2.00 (m, 0.6H), 1.93-1.85 (m, 1.8H), 1.52-1.46 (m, 1H), 1.37 (s, 0.5H), 1.33 (s, 2.5H).

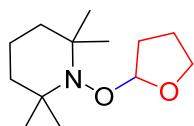

**2,2,6,6-Tetramethyl-1-((tetrahydrofuran-2-yl)oxy)piperidine**

**(4a)** <sup>[1]</sup>, yellow oil (0.1392 g, 73% yield); <sup>1</sup>H NMR (500 MHz,

CDCl<sub>3</sub>) δ: 5.39-5.36 (m, 1H), 3.79-3.73 (m, 1H), 3.60-3.53 (m, 1H), 1.48-1.44 (m, 6H), 1.29 (d, *J* = 5.5 Hz, 3H), 1.20 (t, *J* = 8.0 Hz, 1H), 1.15 (s, 3H), 1.12 (s, 3H), 1.09 (s, 3H), 1.08 (s, 3H); <sup>13</sup>C NMR (125 MHz, CDCl<sub>3</sub>) δ: 109.8, 66.8, 60.4, 59.0, 40.4, 40.0, 33.7, 33.6, 33.5, 20.4, 19.9, 19.2, 17.2.

### (C) Reference

[1] L. Li, Z. Yu and Z. Shen, *Adv. Synth. Catal.* 2015, **357**, 3495.

### (D) Spectra

3-Methyl-4-methylene-1-phenyl-3-((tetrahydrofuran-2-yl)methyl)pyrrolidin-2-one

(3aa)

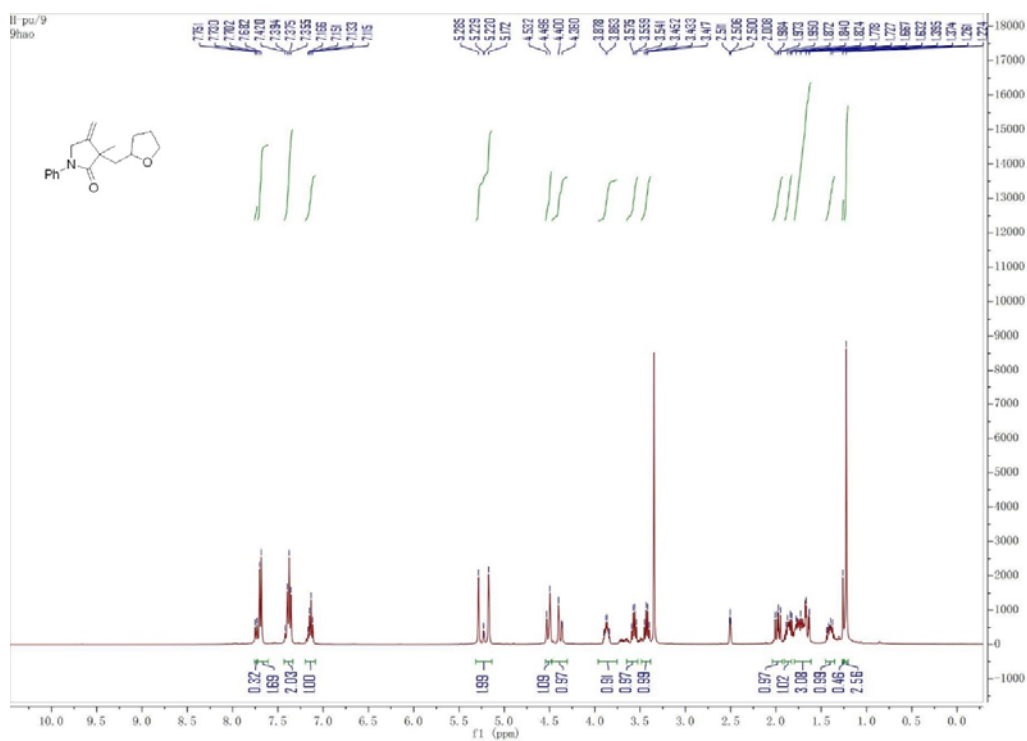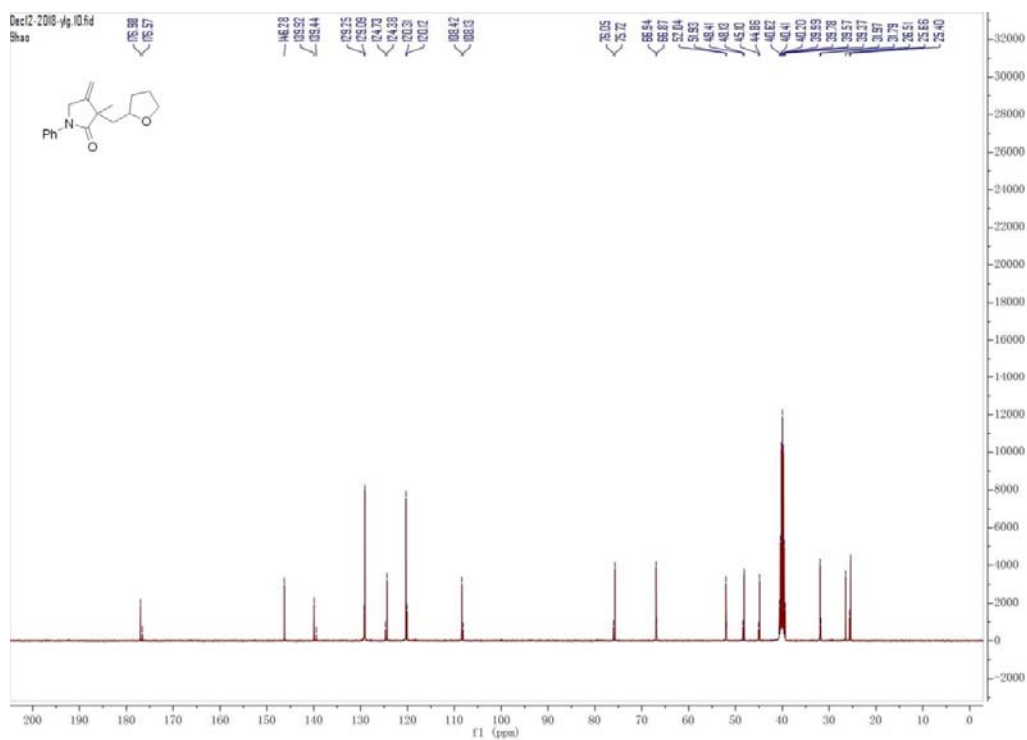

3-Methyl-4-methylene-1-phenyl-3-((tetrahydro-2H-pyran-2-yl)methyl)pyrrolidin-2-one

e (3ab)

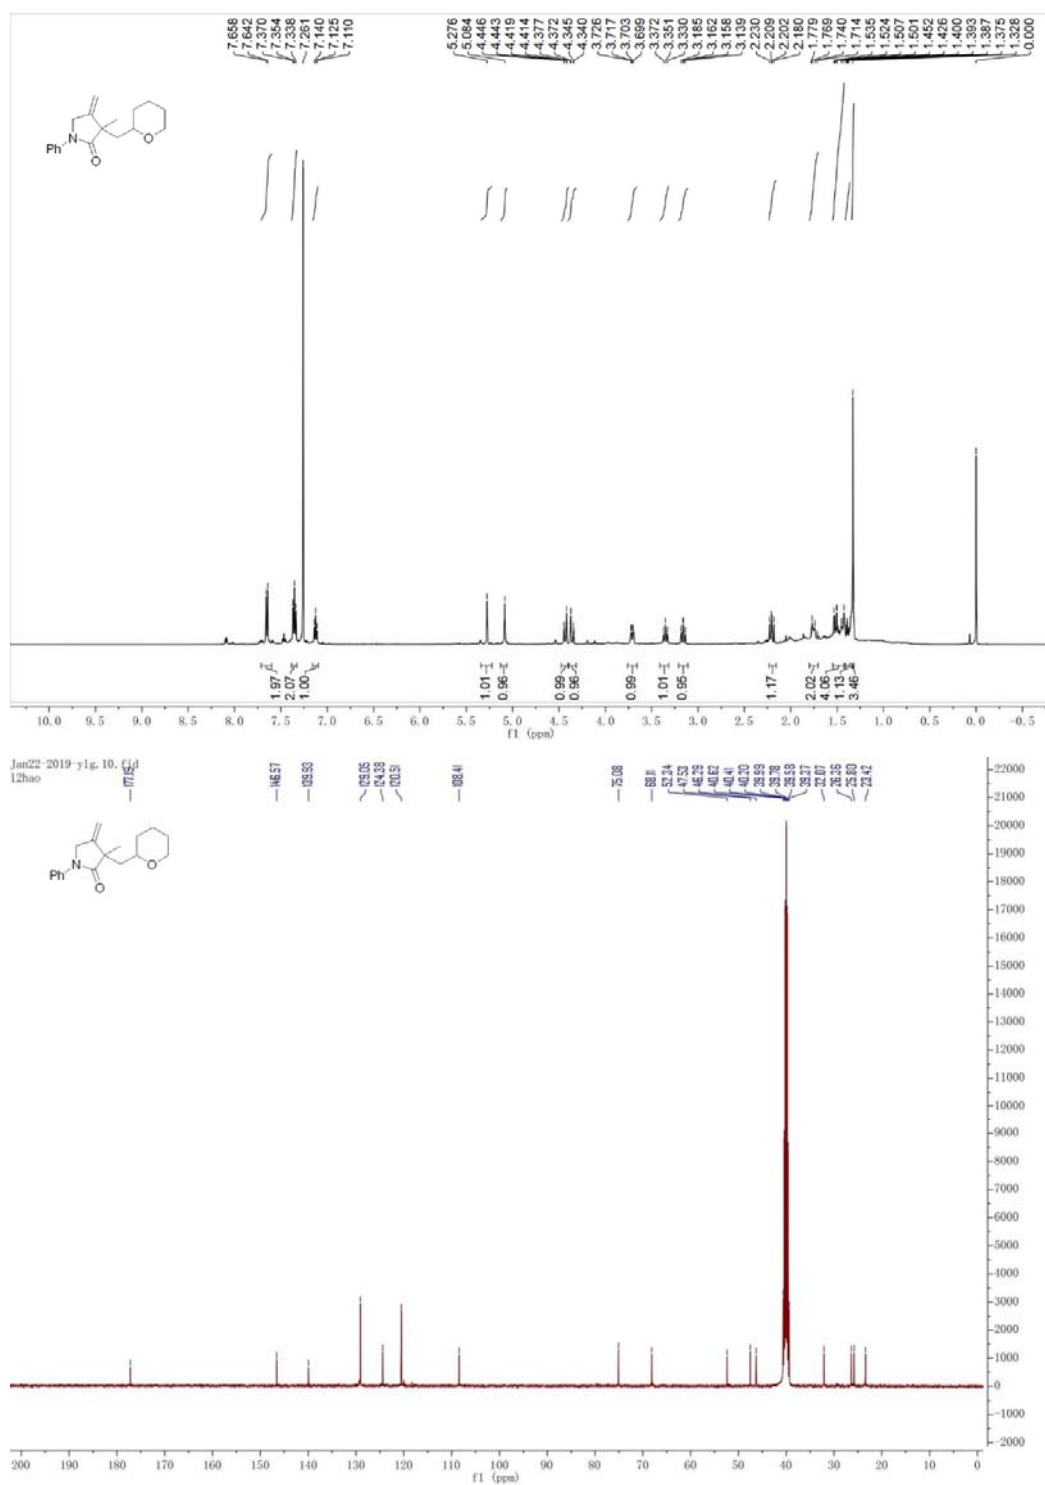

3-((1,4-Dioxan-2-yl)methyl)-3-methyl-4-methylene-1-phenylpyrrolidin-2-one (**3ac**)

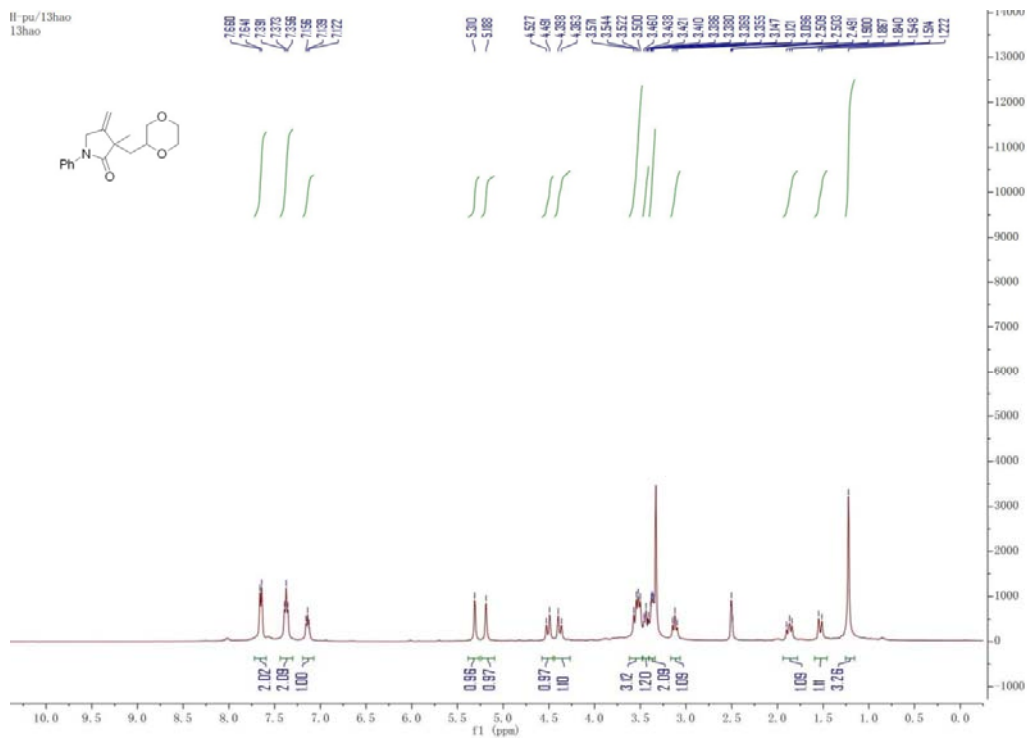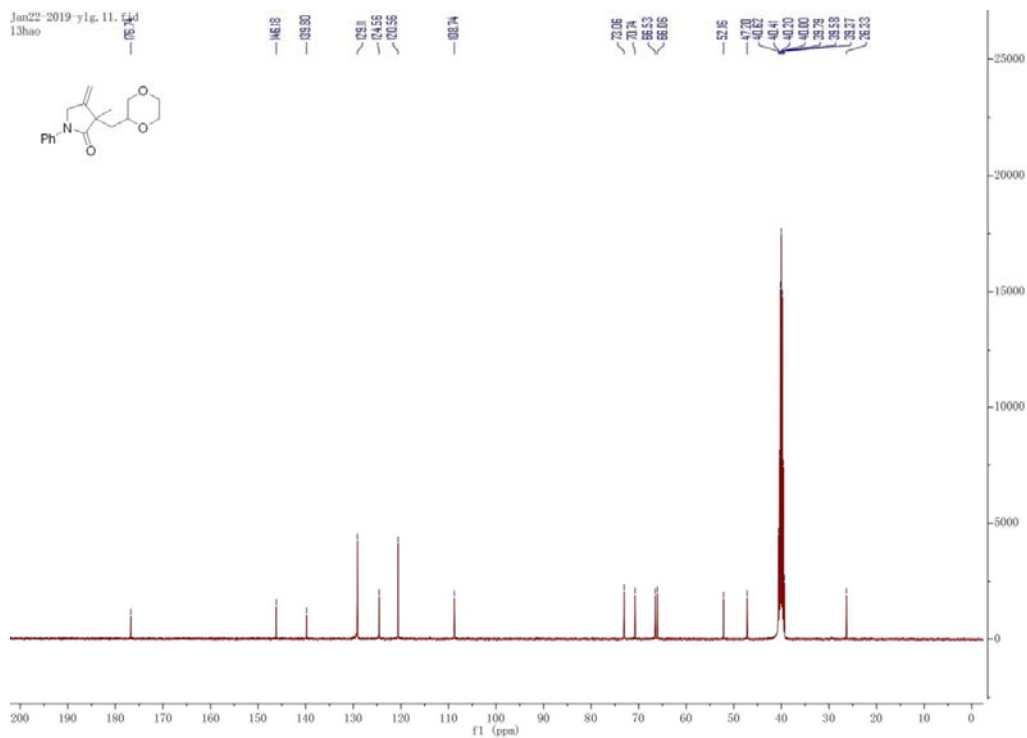

3-(2-Ethoxypropyl)-3-methyl-4-methylene-1-phenylpyrrolidin-2-one (**3ad**)

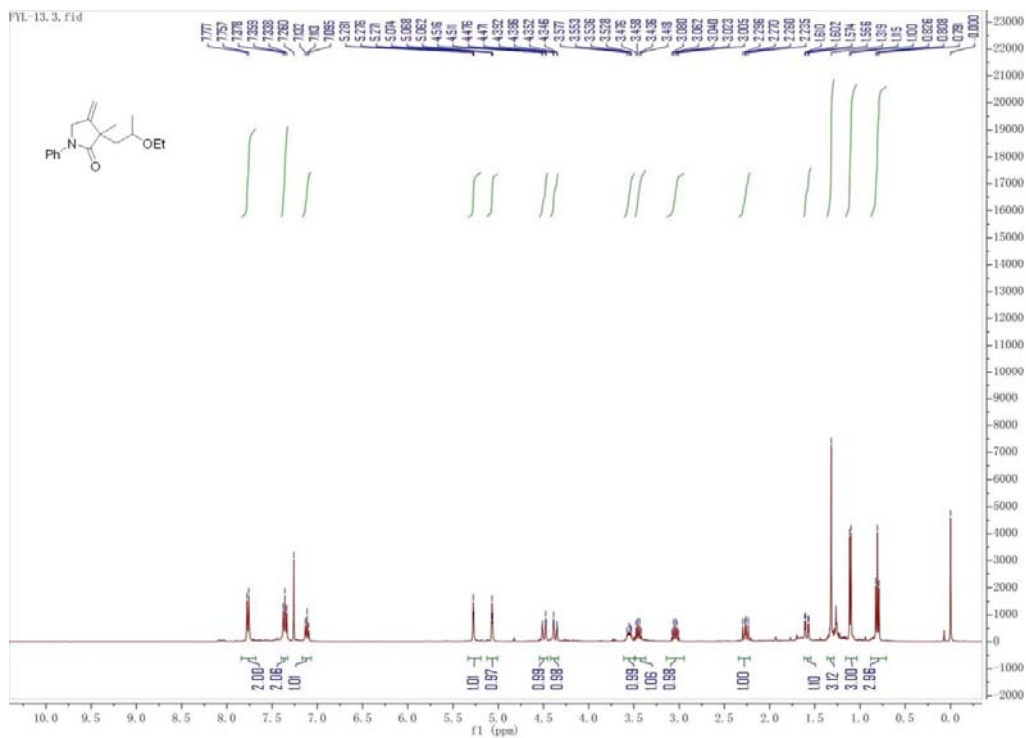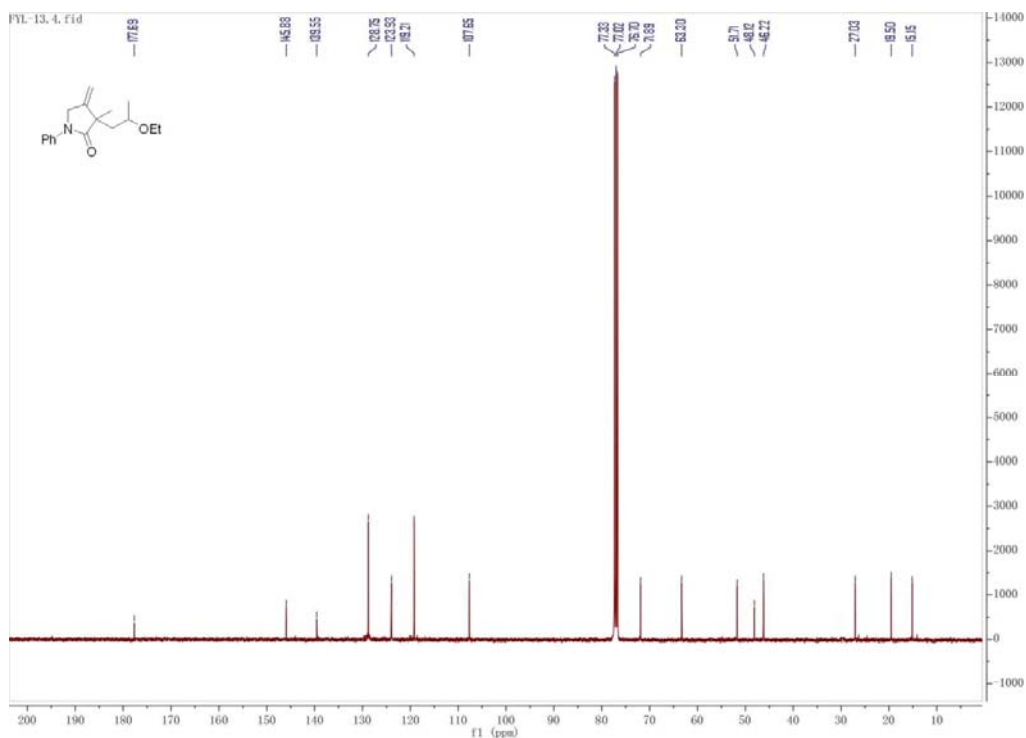





3-(2-(Ethylthio)propyl)-3-methyl-4-methylene-1-phenylpyrrolidin-2-one (**3af**)

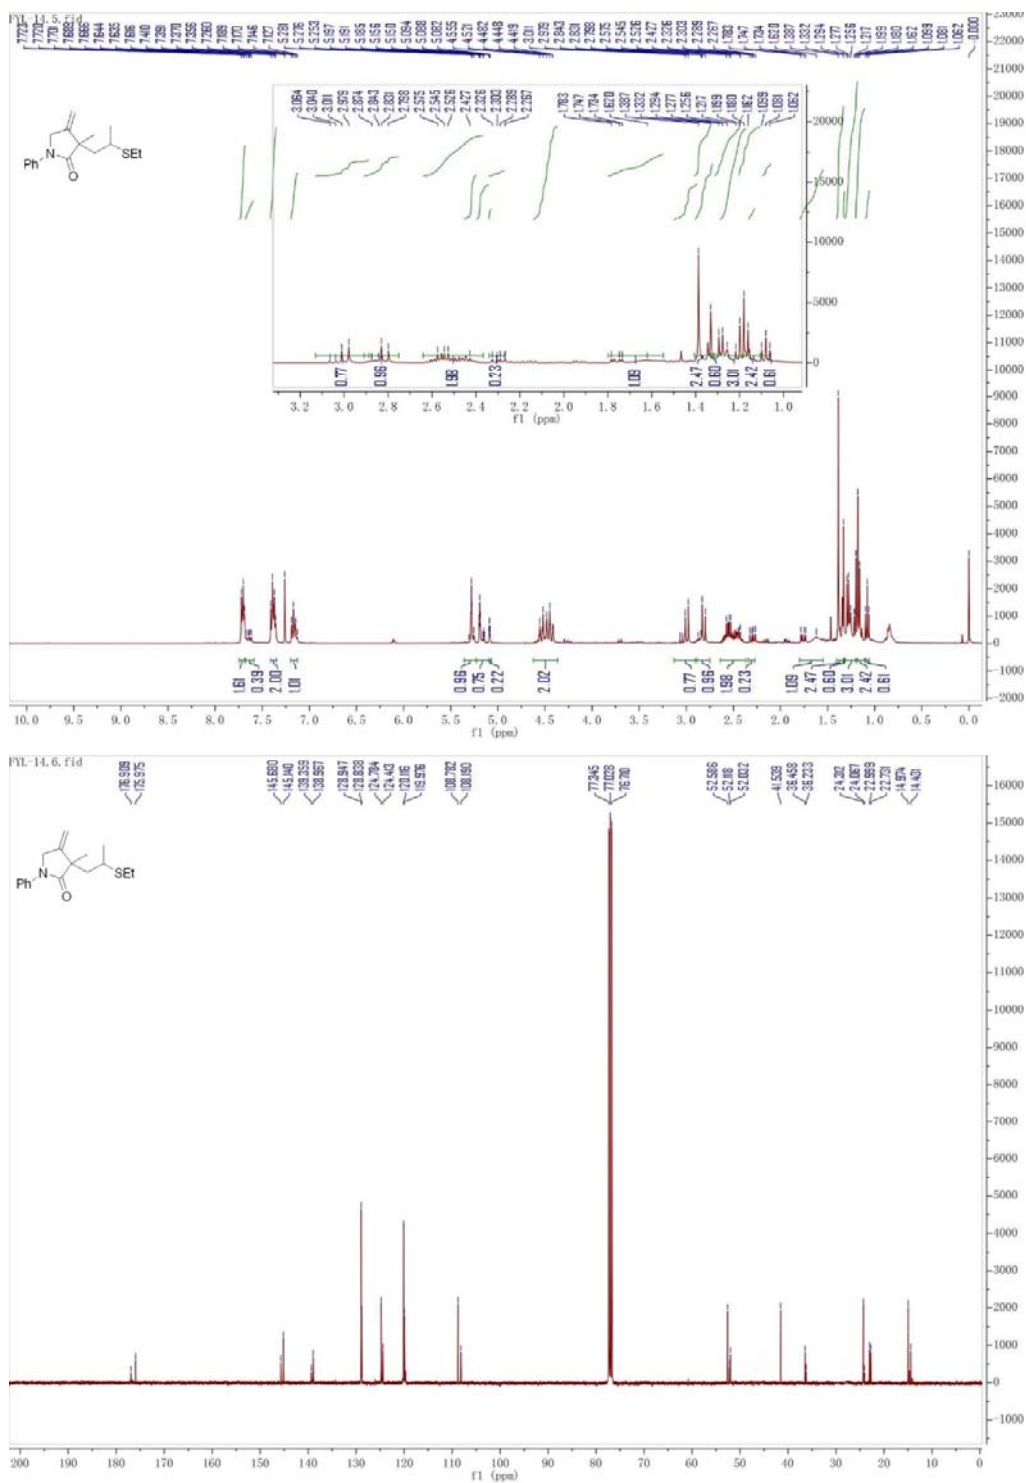

1-(4-Methoxyphenyl)-3-methyl-4-methylene-3-((tetrahydrofuran-2-yl)methyl)pyrrolid

in-2-one (**3ba**)

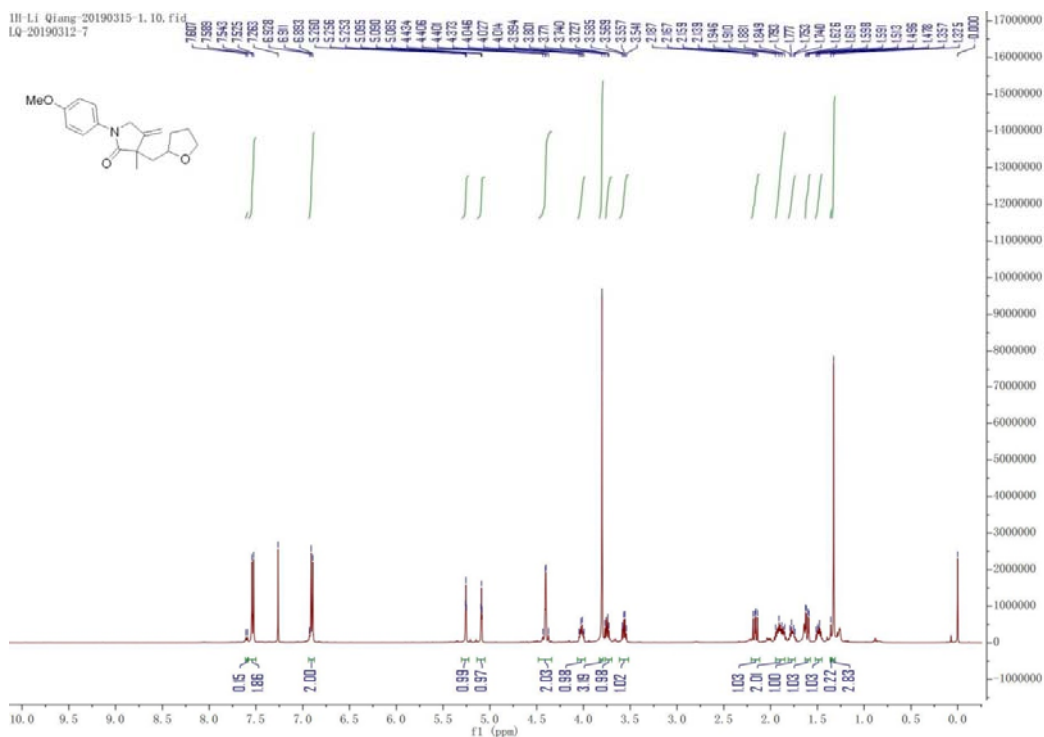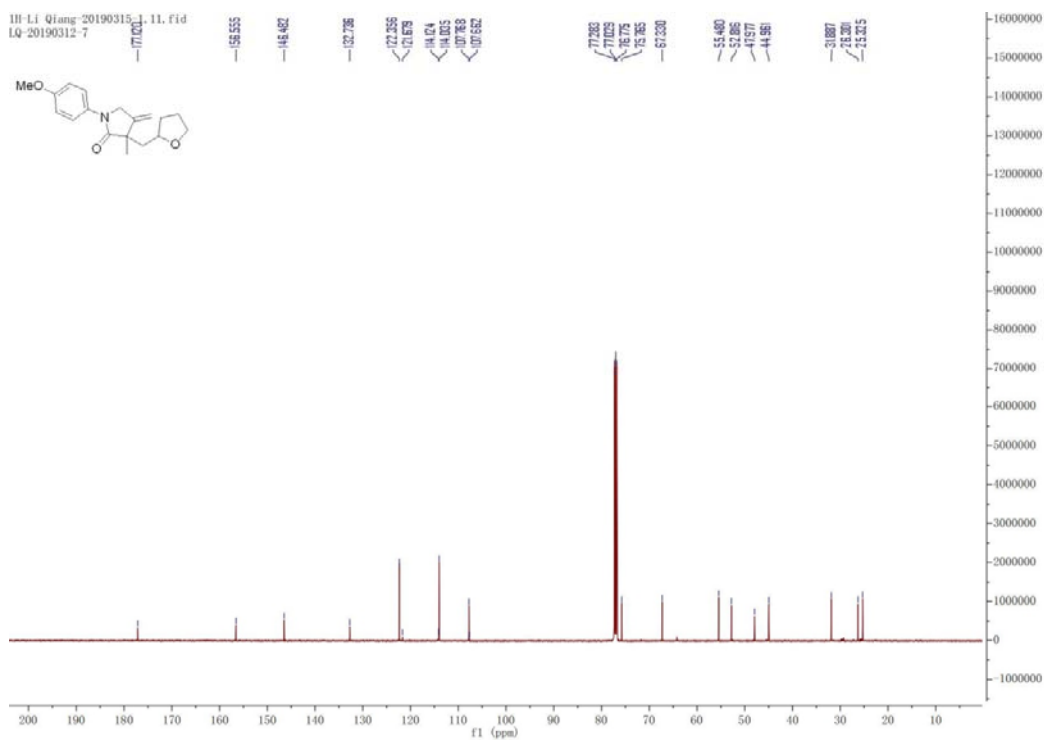

3-Methyl-4-methylene-3-((tetrahydrofuran-2-yl)methyl)-1-(p-tolyl)pyrrolidin-2-one

(3ca)

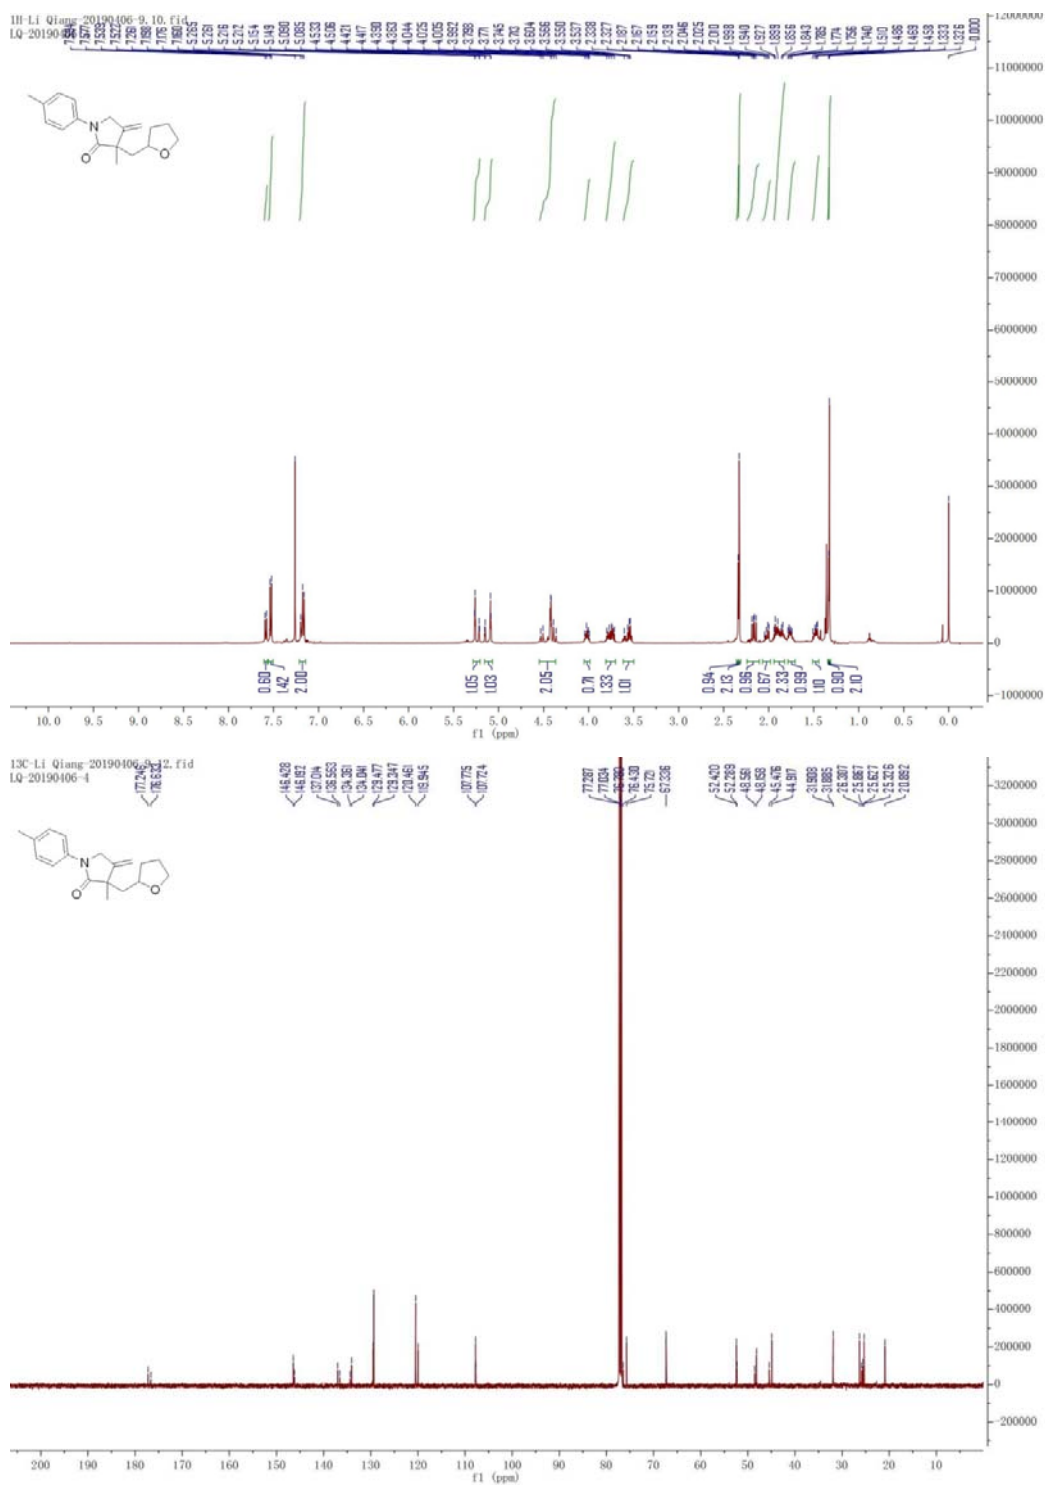

1-(4-(*tert*-Butyl)phenyl)-3-methyl-4-methylene-3-((tetrahydrofuran-2-yl)methyl)pyrro-

lidin-2-one (**3da**)

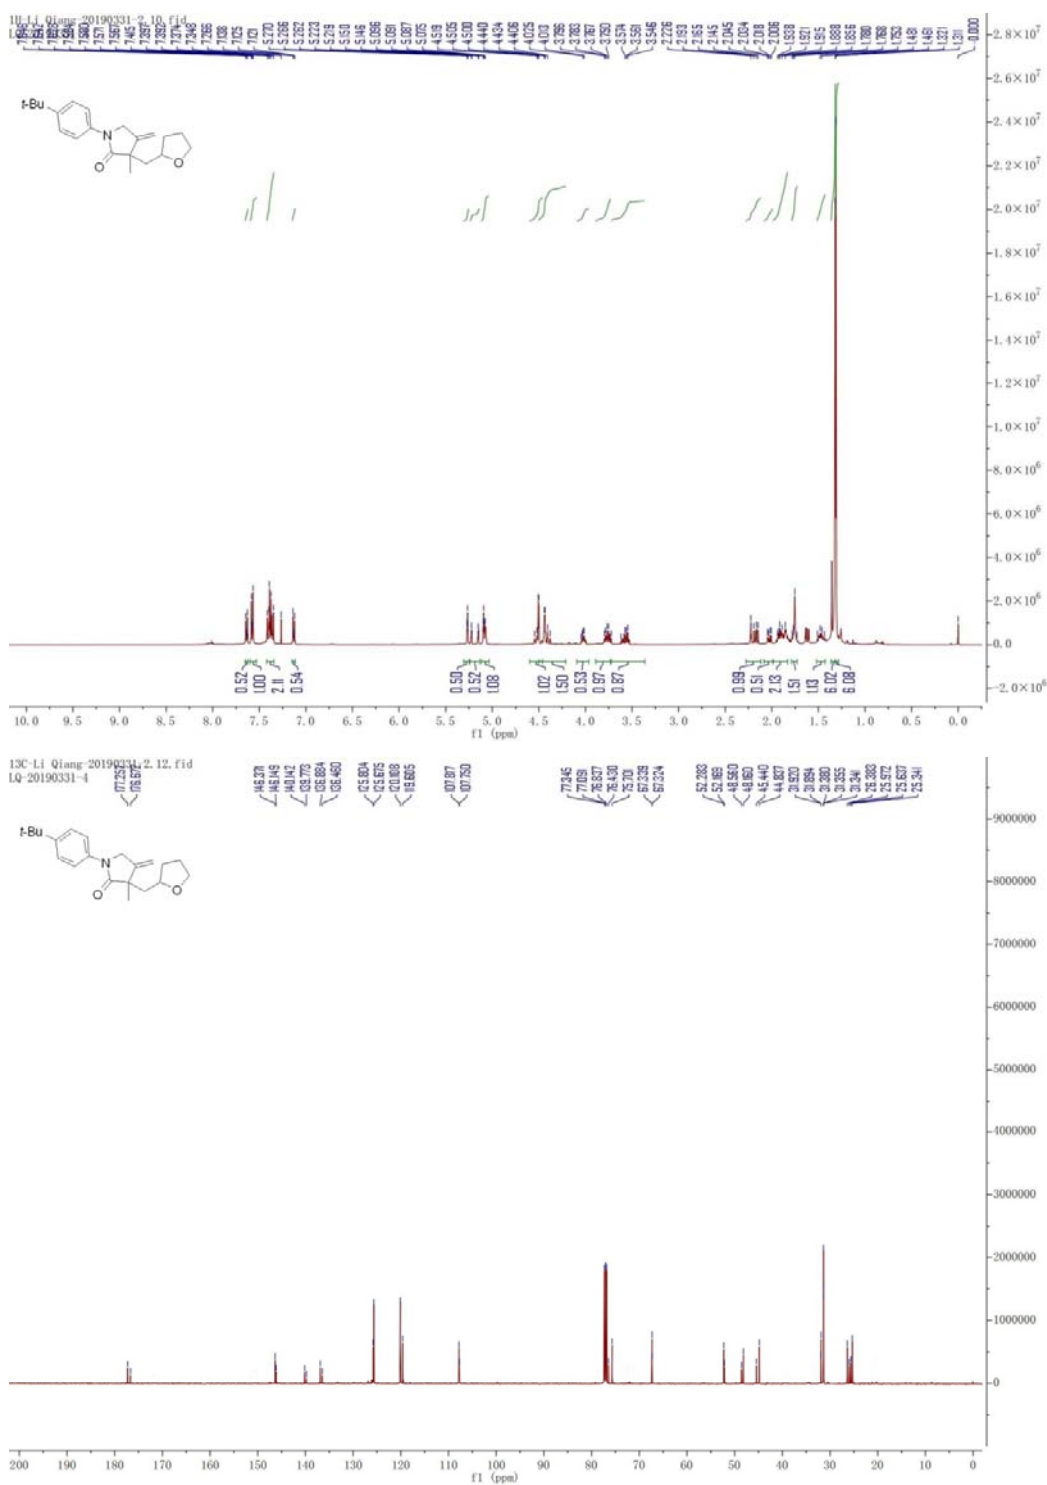

1-(4-Fluorophenyl)-3-methyl-4-methylene-3-((tetrahydrofuran-2-yl)methyl)pyrrolidin-2-one (3ea)

-2-one (3ea)

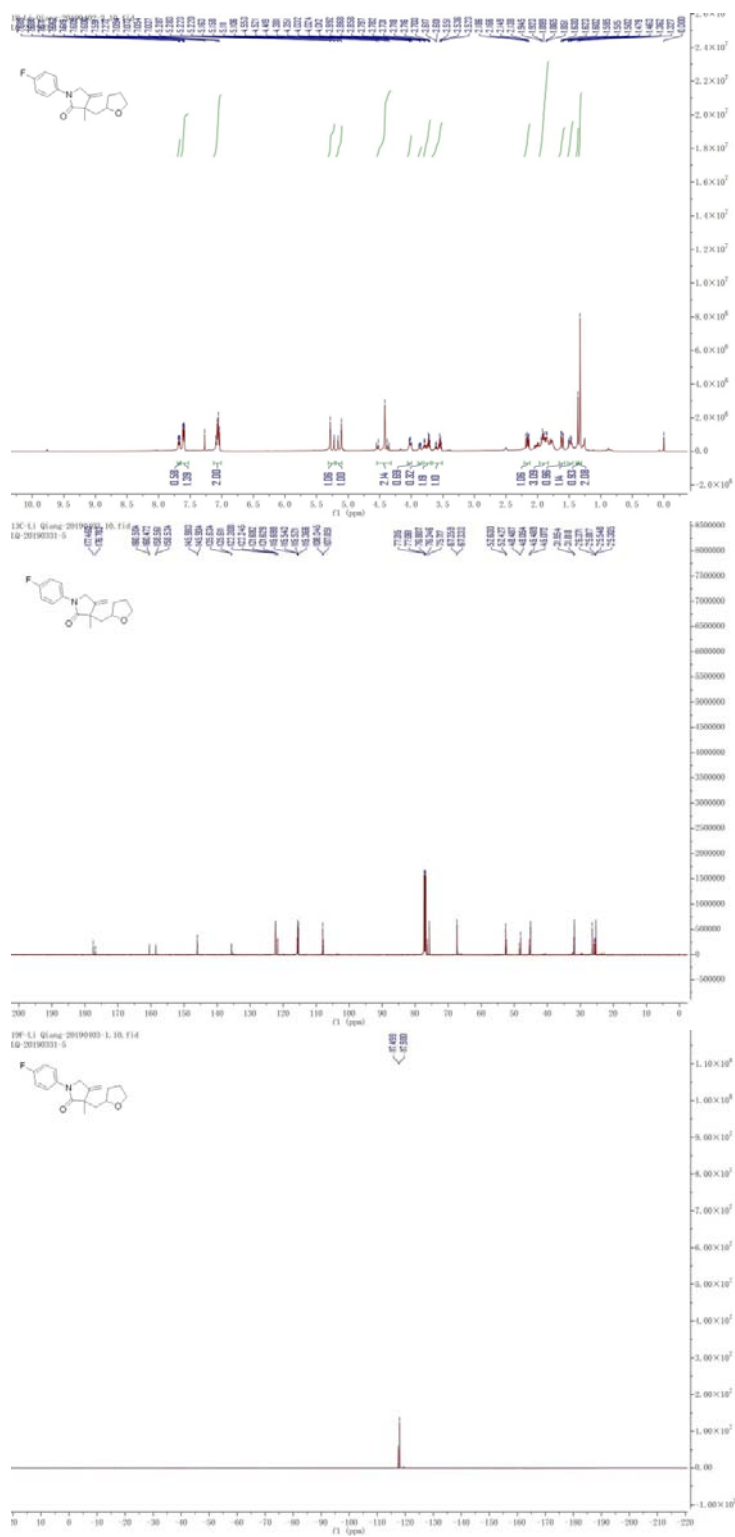

1-(4-Chlorophenyl)-3-methyl-4-methylene-3-((tetrahydrofuran-2-yl)methyl)pyrrolidin

-2-one (**3fa**)

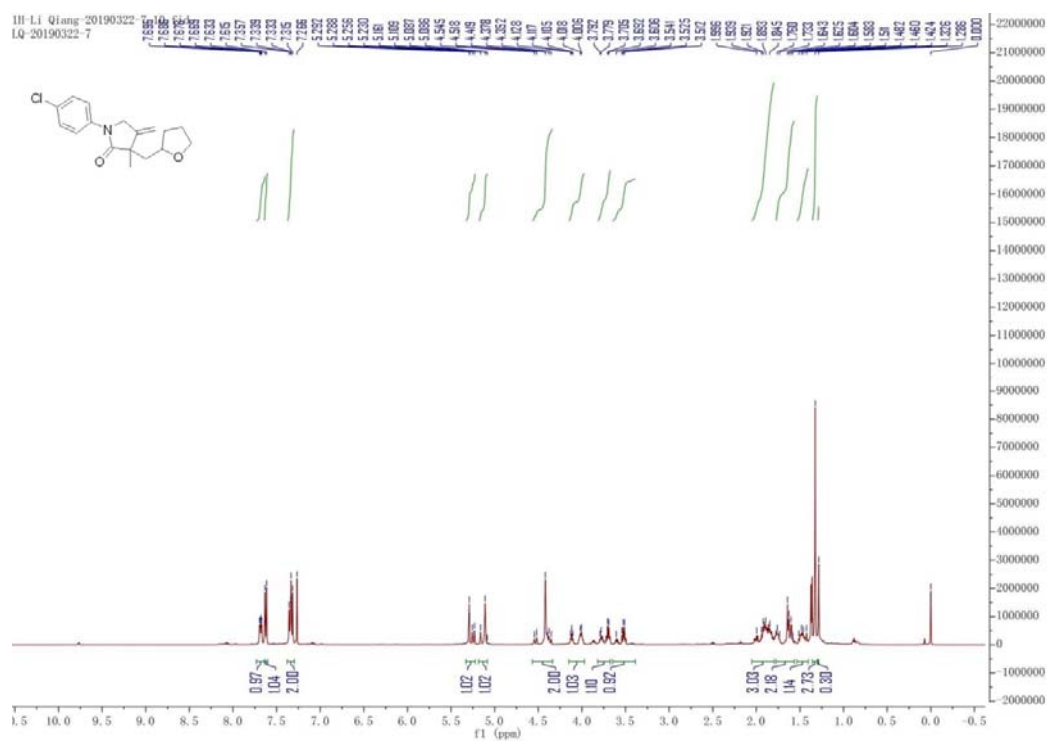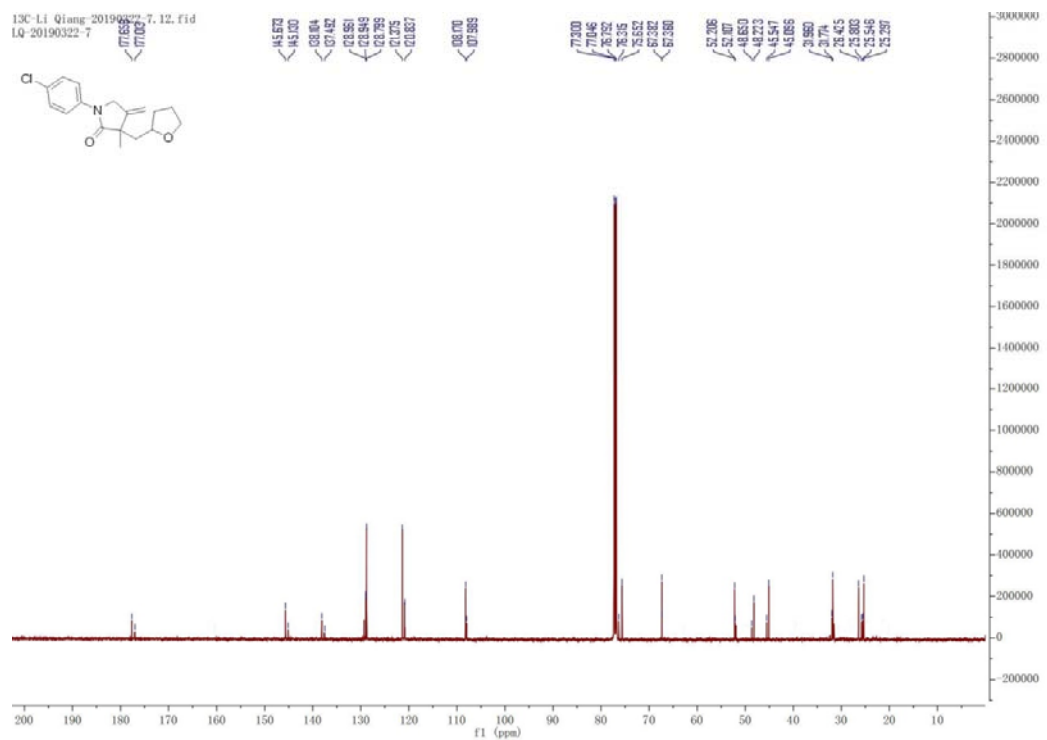

1-(4-Bromophenyl)-3-methyl-4-methylene-3-((tetrahydrofuran-2-yl)methyl)pyrrolidin-2-one (3ga)

-2-one (3ga)

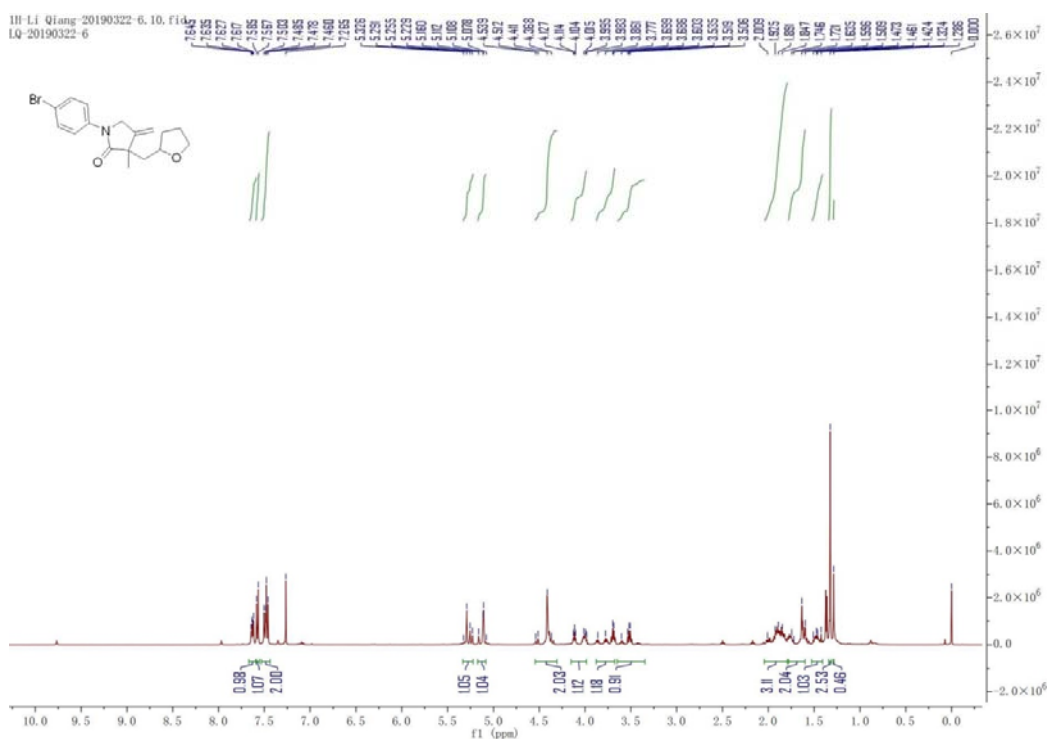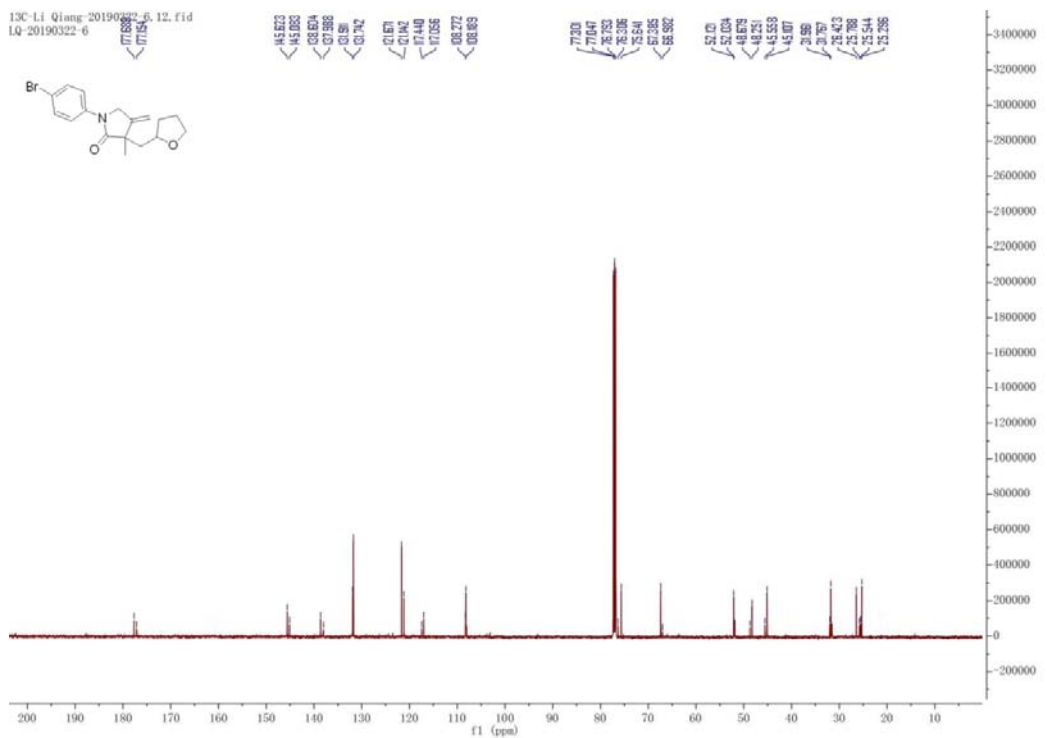



3-Methyl-4-methylene-3-((tetrahydrofuran-2-yl)methyl)-1-(4-(trifluoromethyl)phenyl)  
pyrrolidin-2-one (**3ha**)

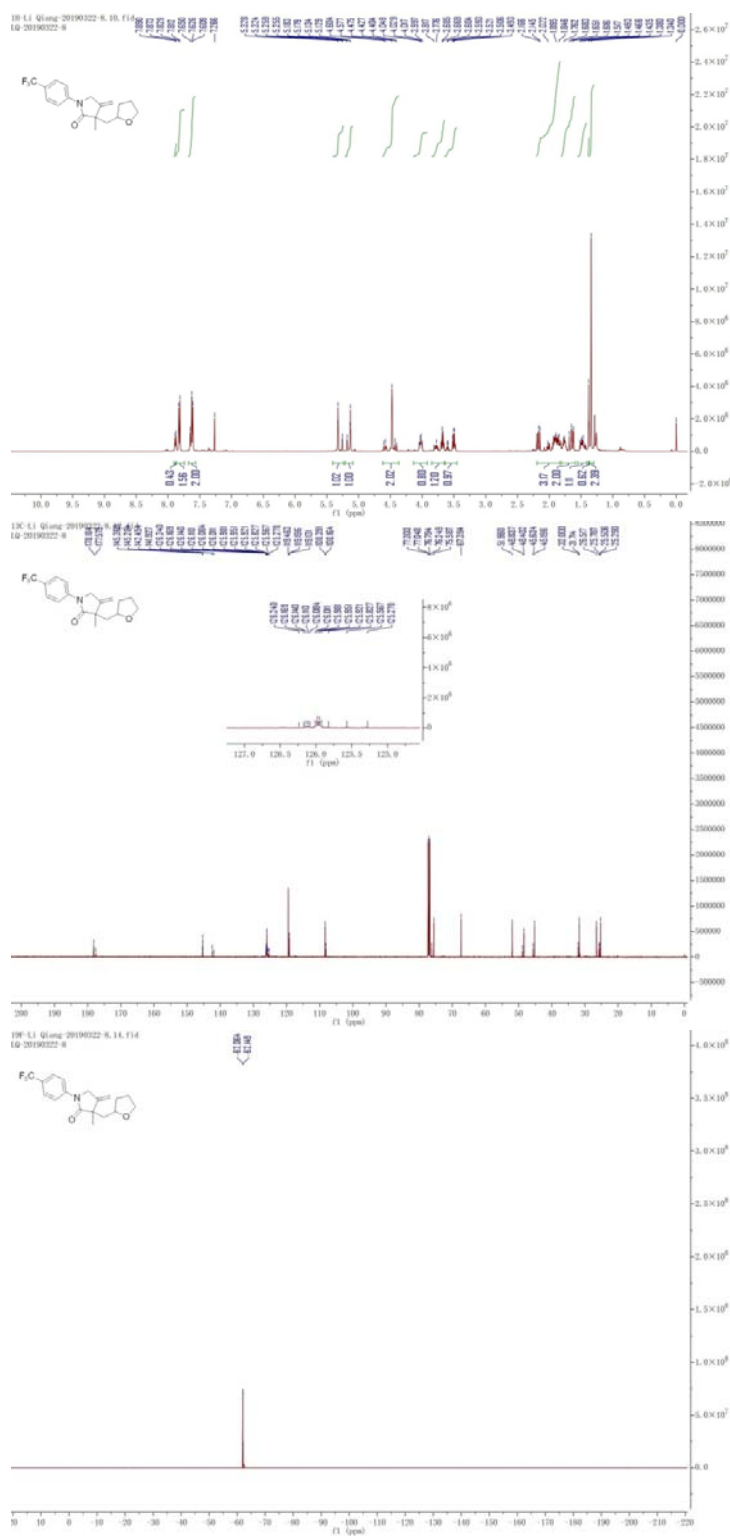

3-Methyl-4-methylene-3-((tetrahydrofuran-2-yl)methyl)-1-(m-tolyl)pyrrolidin-2-one

(3ia)

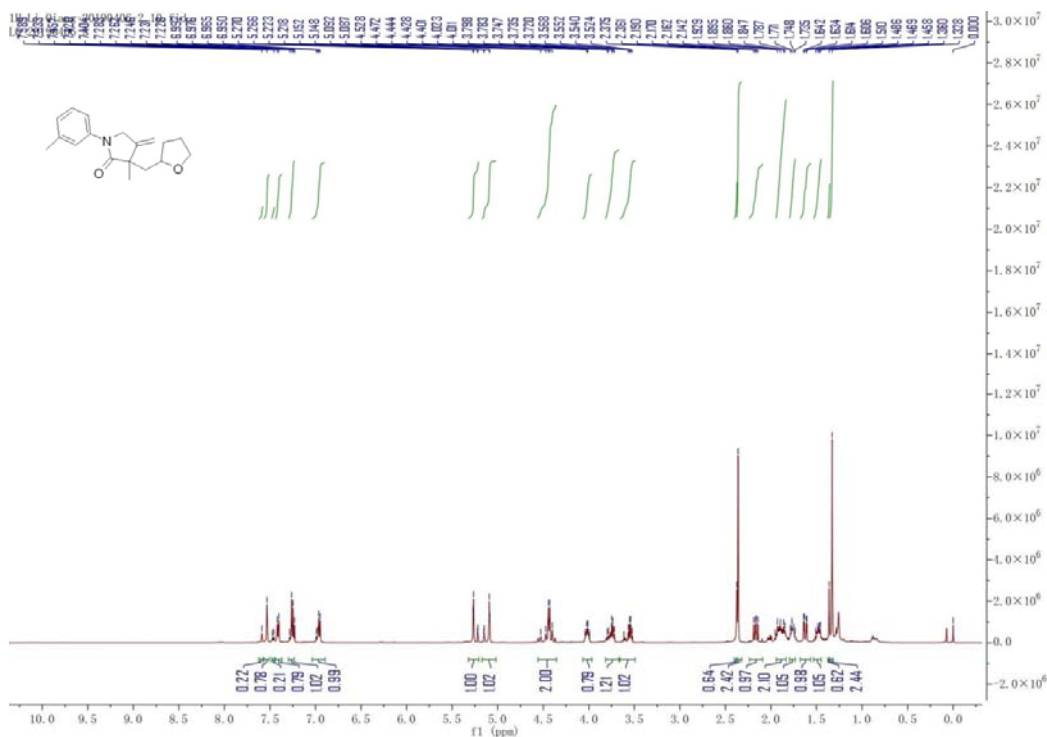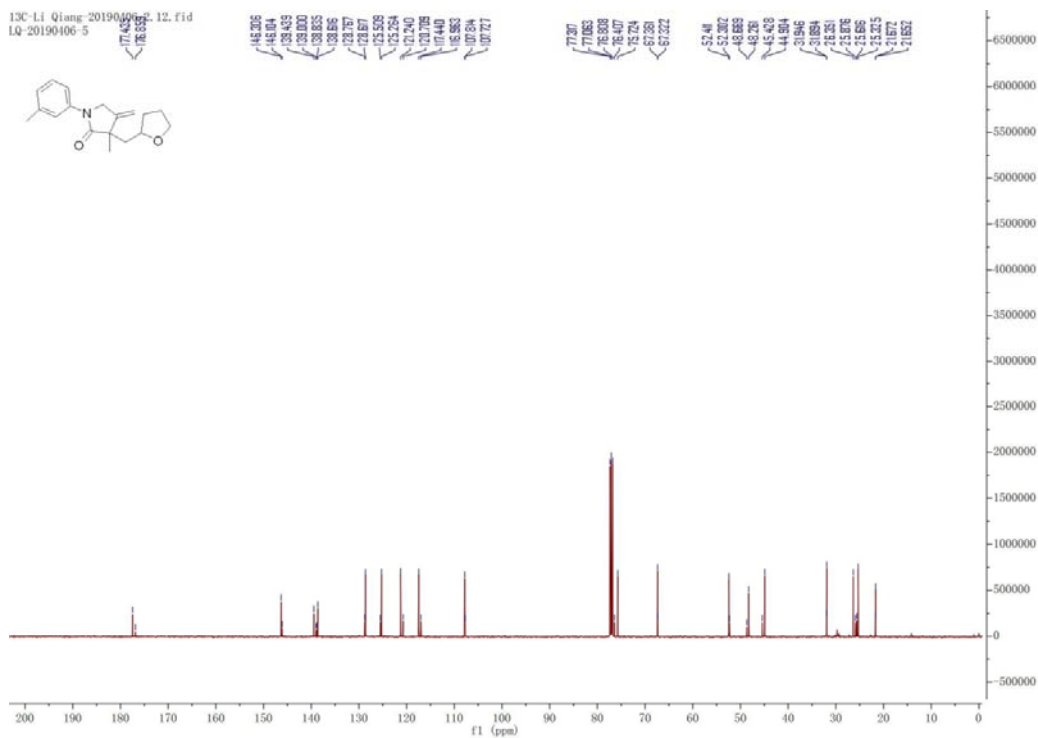

1-(3-Chlorophenyl)-3-methyl-4-methylene-3-((tetrahydrofuran-2-yl)methyl)pyrrolidin

-2-one (**3ja**)

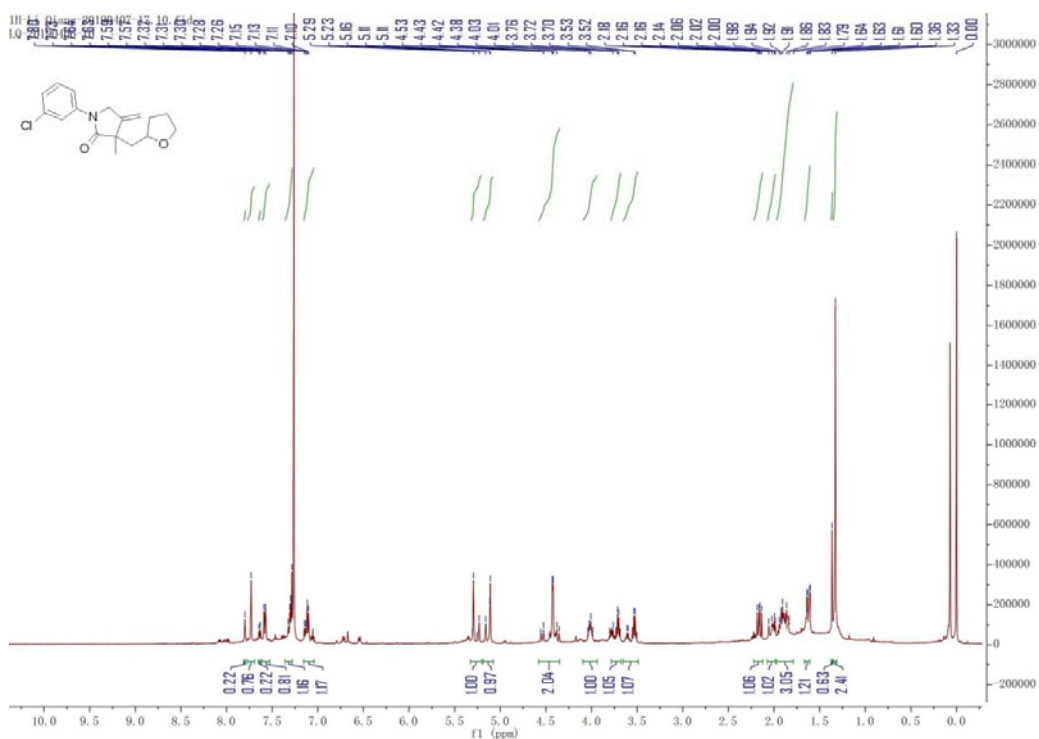

4-Ethylidene-3-methyl-1-phenyl-3-((tetrahydrofuran-2-yl)methyl)pyrrolidin-2-one

(3la)

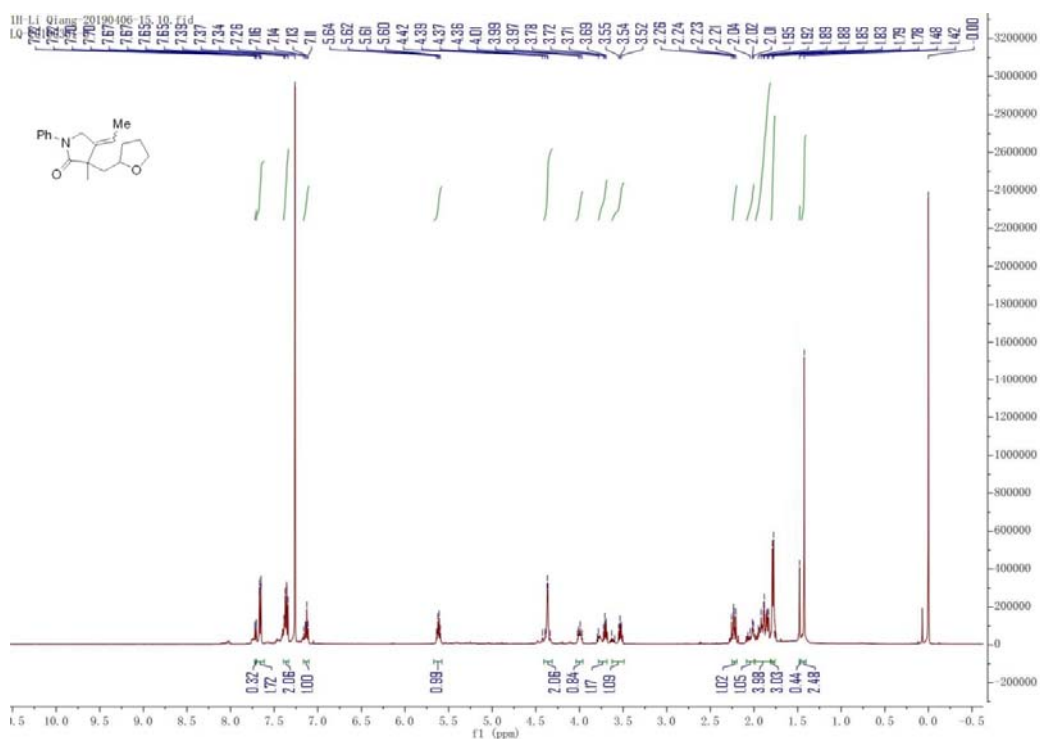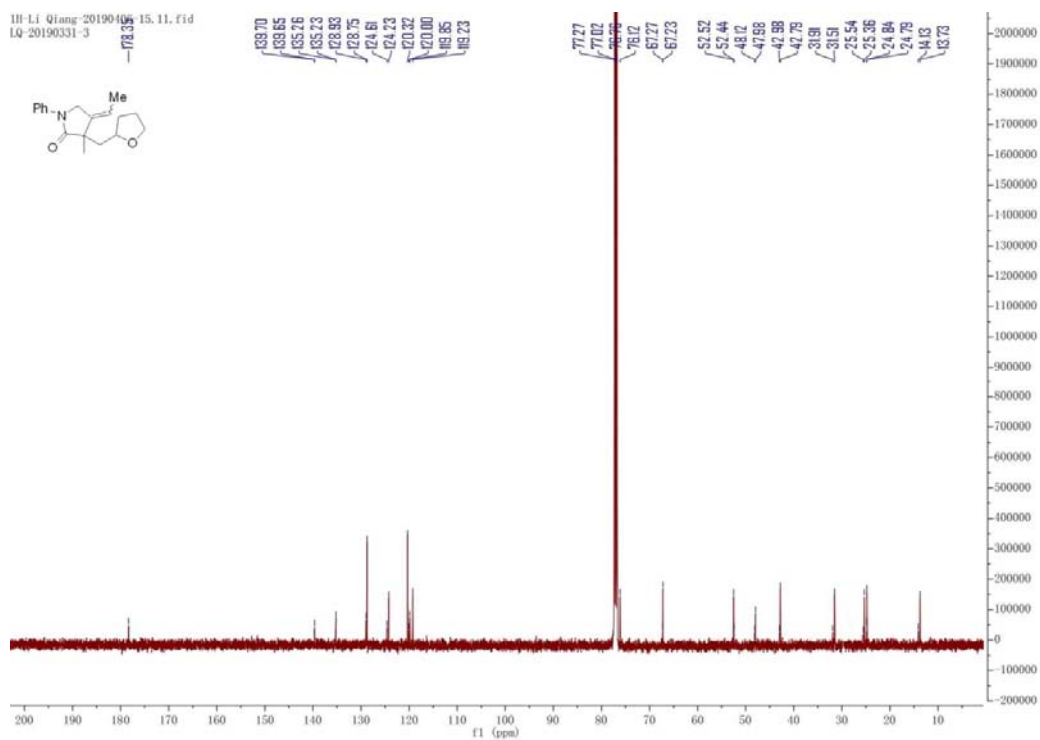

3-Benzyl-4-methylene-1-phenyl-3-((tetrahydrofuran-2-yl)methyl)pyrrolidin-2-one

(3na)

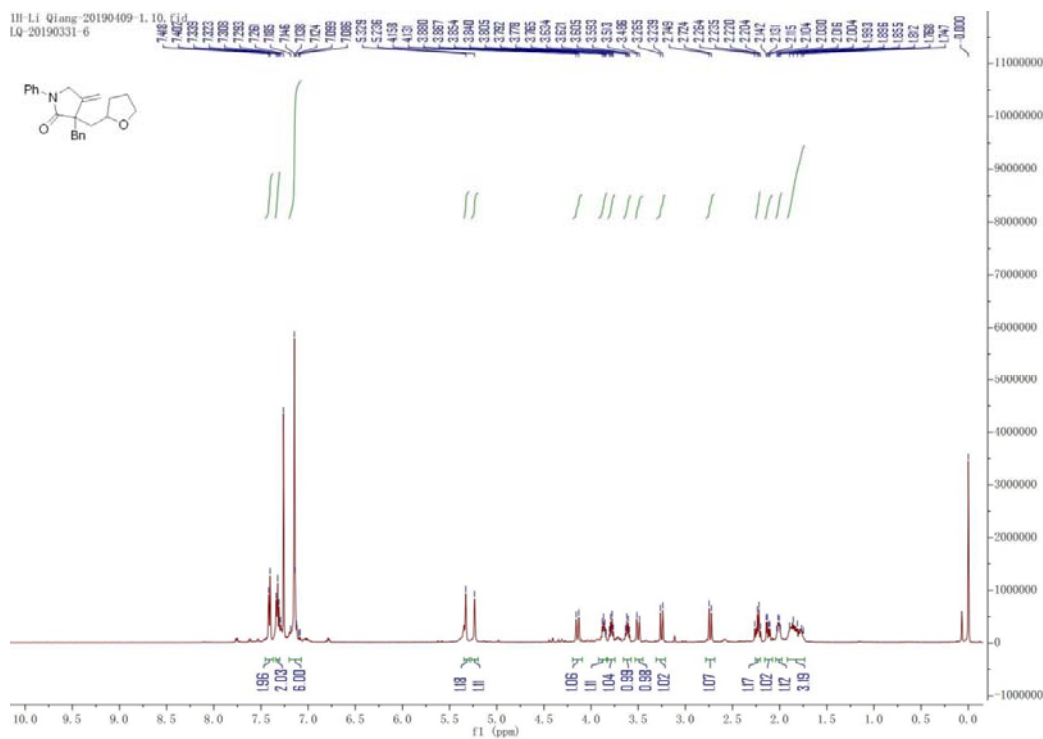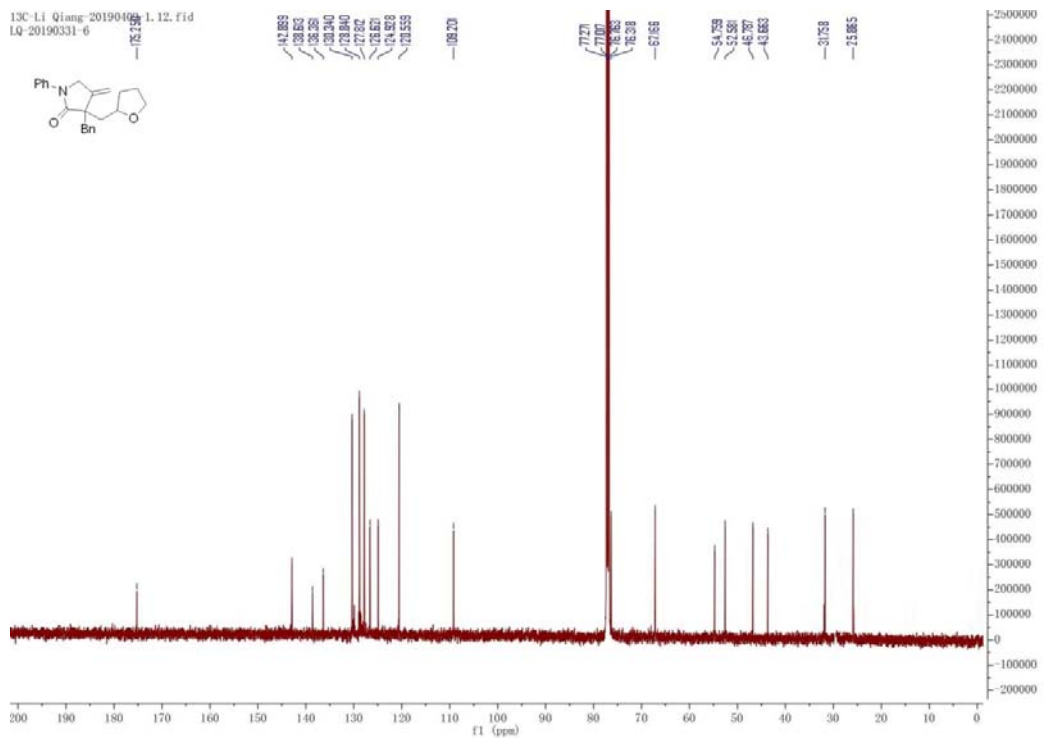

4-Methylene-1,3-diphenyl-3-((tetrahydrofuran-2-yl)methyl)pyrrolidin-2-one (**30a**)

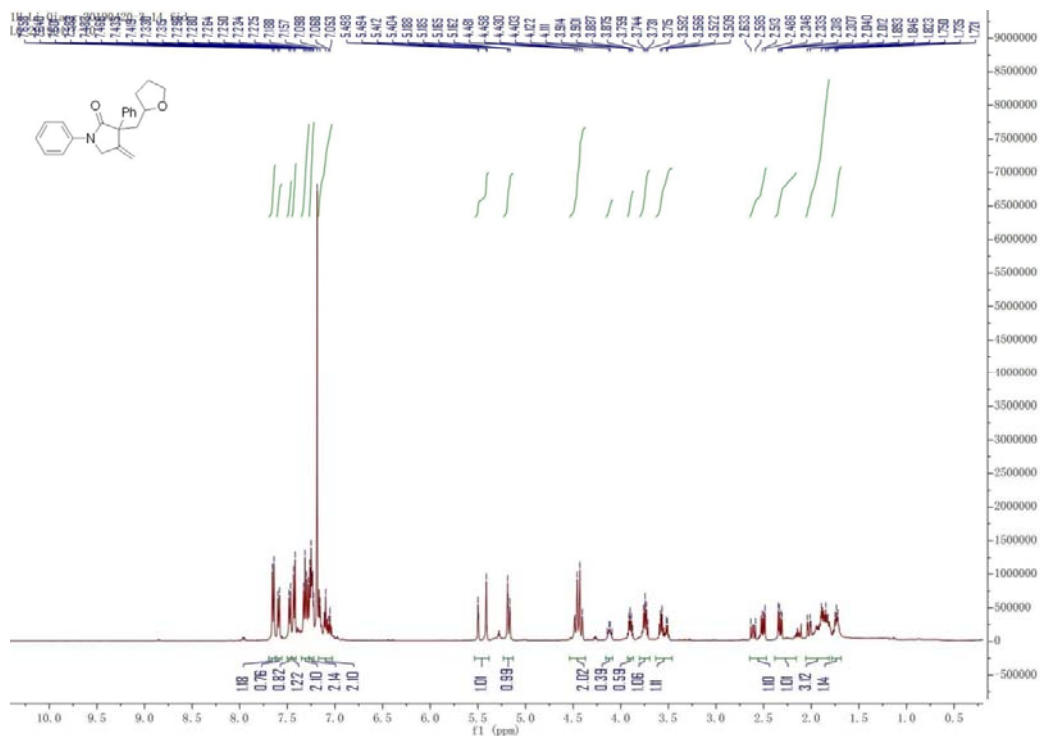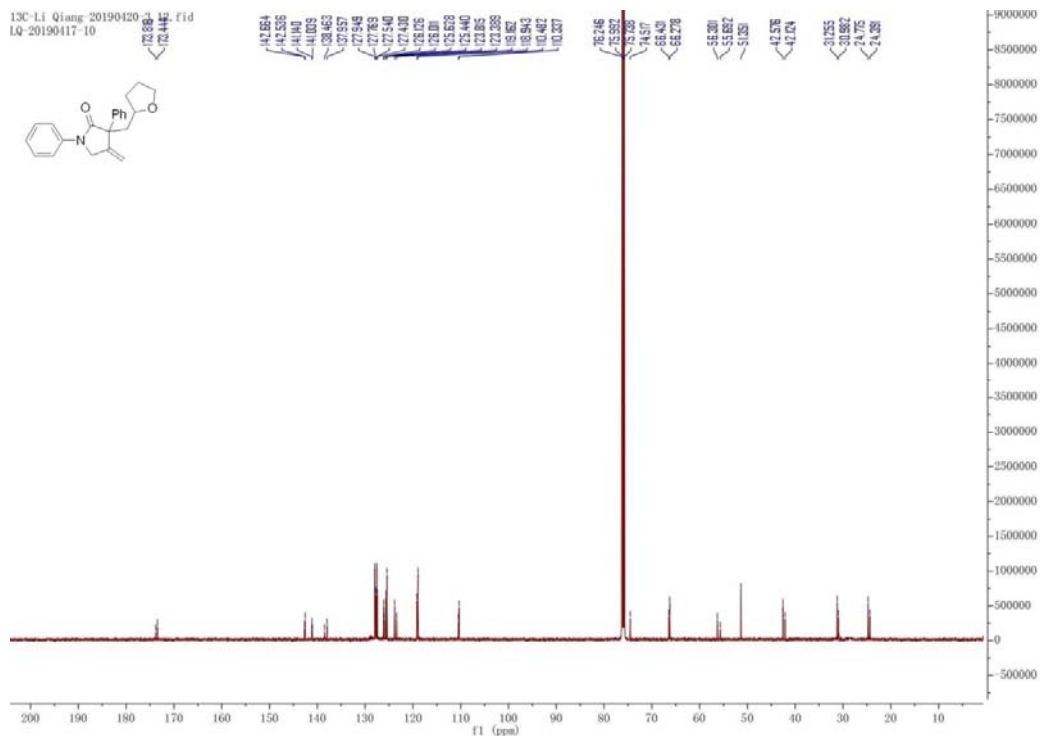

### 3aa and 3aa-d7

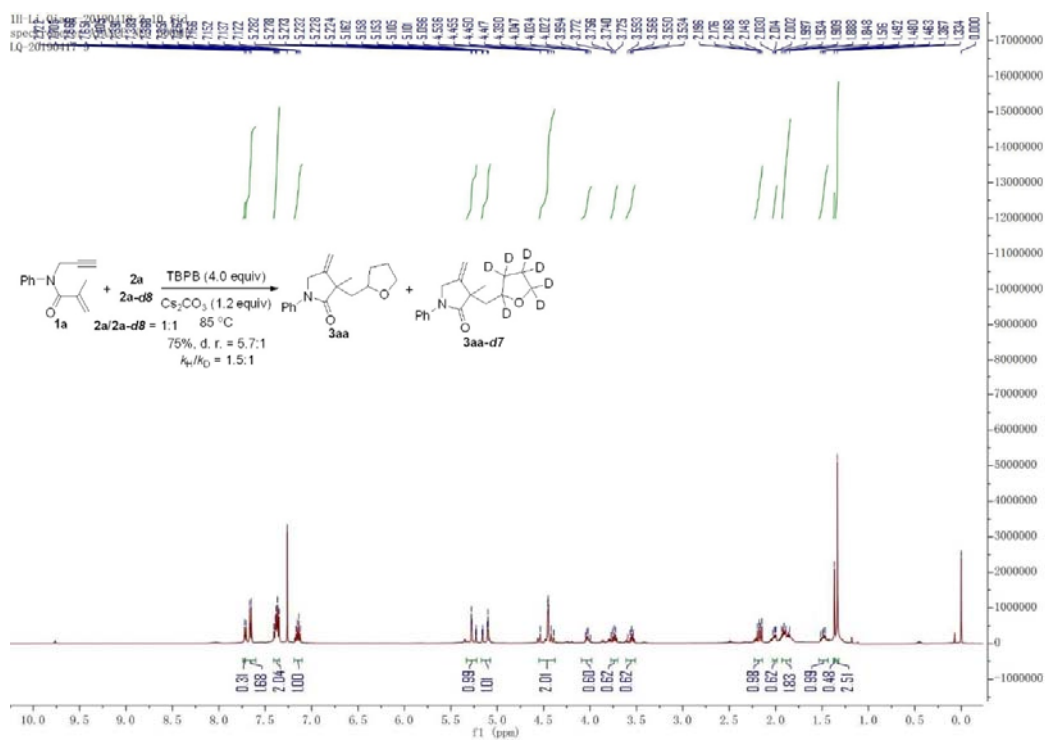

2,2,6,6-Tetramethyl-1-((tetrahydrofuran-2-yl)oxy)piperidine (**4a**)

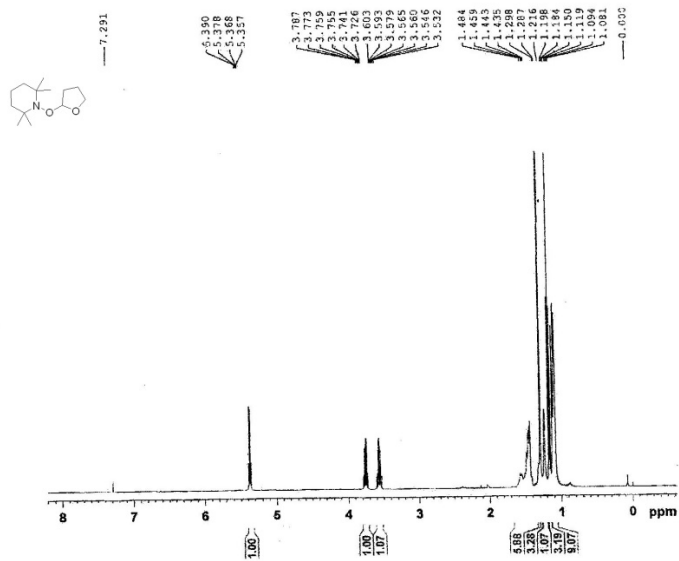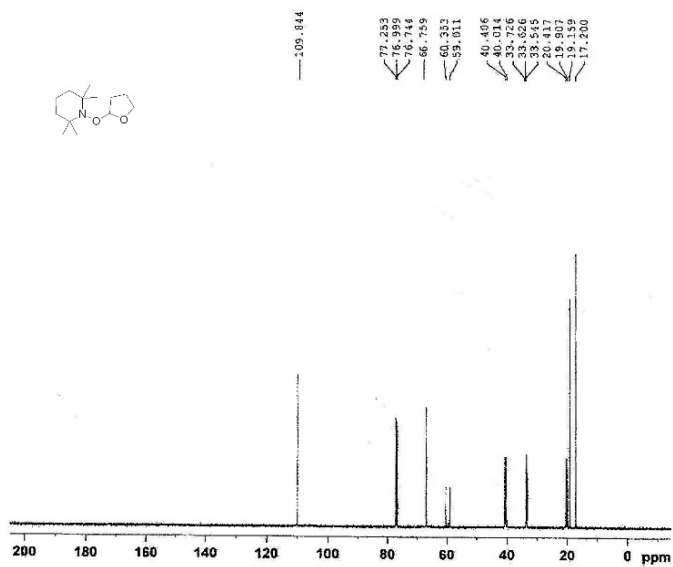

Supplement: c9ob01550g1.pdf [file c9ob01550g1.pdf]
